# Supplementary material for: Development of a Sensitive Screening Method for Simultaneous Determination of Nine Genotoxic Nitrosamines in Active Pharmaceutical Ingredients by GC-MS
Source: MDPI journal article supplement (doi:10.3390/ijms232012125), 2022-10-12
Supplement: s1 [file s1]

## **Development of a sensitive screening method for simultaneous determination of nine genotoxic nitrosamines in active pharmaceutical ingredients by GC-MS.**

Anna B. Witkowska<sup>1,2\*</sup>, Joanna Giebułtowicz<sup>3</sup>, Magdalena Dąbrowska<sup>1</sup> and Elżbieta U. Stolarczyk<sup>1,4</sup>

### List of Figures, Tables and Notes:

|                                                                                                                                            |    |
|--------------------------------------------------------------------------------------------------------------------------------------------|----|
| TABLE S1. RESULTS OF SOLUBILITY ANALYSES OF SUNITINIB MALATE.                                                                              | 4  |
| TABLE S2.RESULTS OF SOLUBILITY ANALYSES OF OLMESARTAN MEDOXOMIL.                                                                           | 5  |
| TABLE S3.RESULTS OF SOLUBILITY ANALYSES OF CILOSTAZOL.                                                                                     | 5  |
| TABLE S4.EXPERIMENTAL DESIGN FOR OPTIMIZING THE EXTRACTION CONDITIONS.                                                                     | 6  |
| TABLE S5.COMPARISON OF THE RESULTS OF THIS PUBLICATION WITH VARIOUS REPORTED GC-MS AND GC-MS/MS METHODS FOR THE DETECTION OF NITROSAMINES. | 6  |
| TABLE S6.THE RESULTS OF THE ROBUSTNESS FOR NINE NITROSAMINES.                                                                              | 9  |
| TABLE S7.RESULTS OF SYSTEM PRECISION FOR NDMA.                                                                                             | 10 |
| TABLE S8.RESULTS OF SYSTEM PRECISION FOR NMEA.                                                                                             | 10 |
| TABLE S9.RESULTS OF SYSTEM PRECISION FOR NDEA.                                                                                             | 11 |
| TABLE S10.RESULTS OF SYSTEM PRECISION FOR NDPA.                                                                                            | 11 |
| TABLE S11.RESULTS OF SYSTEM PRECISION FOR NMOR.                                                                                            | 12 |
| TABLE S12.RESULTS OF SYSTEM PRECISION FOR NPYR.                                                                                            | 13 |
| TABLE S13.RESULTS OF SYSTEM PRECISION FOR NPIP.                                                                                            | 13 |
| TABLE S14.RESULTS OF SYSTEM PRECISION FOR NDPA.                                                                                            | 14 |
| TABLE S15.RESULTS OF SYSTEM PRECISION FOR N-METHYL-NPZ.                                                                                    | 14 |
| TABLE S16.RESULTS OF EXAMINED SAMPLE SOLUTION WITH NDMA AT 100% CONCENTRATION LEVEL.                                                       | 15 |
| TABLE S17.RESULTS OF EXAMINED SAMPLE SOLUTION WITH NMEA AT 100% CONCENTRATION LEVEL.                                                       | 15 |
| TABLE S18.RESULTS OF EXAMINED SAMPLE SOLUTION WITH NDEA AT 100% CONCENTRATION LEVEL.                                                       | 16 |
| TABLE S19.RESULTS OF EXAMINED SAMPLE SOLUTION WITH NDPA AT 100% CONCENTRATION LEVEL.                                                       | 16 |
| TABLE S20.RESULTS OF EXAMINED SAMPLE SOLUTION WITH NMOR AT 100% CONCENTRATION LEVEL.                                                       | 17 |
| TABLE S21.RESULTS OF EXAMINED SAMPLE SOLUTION WITH NPYR AT 100% CONCENTRATION LEVEL.                                                       | 17 |
| TABLE S22.RESULTS OF EXAMINED SAMPLE SOLUTION WITH NPIP AT 100% CONCENTRATION LEVEL.                                                       | 18 |

|                                                                                                                                                                                                                                                                                                  |    |
|--------------------------------------------------------------------------------------------------------------------------------------------------------------------------------------------------------------------------------------------------------------------------------------------------|----|
| TABLE S23.RESULTS OF EXAMINED SAMPLE SOLUTION WITH NDBA AT 100%<br>CONCENTRATION LEVEL.                                                                                                                                                                                                          | 19 |
| TABLE S24.RESULTS OF EXAMINED SAMPLE SOLUTION WITH N-METHYL-NPZ AT 100%<br>CONCENTRATION LEVEL.                                                                                                                                                                                                  | 19 |
| FIGURE S1. COMPARISON OF CHROMATOGRAMS FOR NDMA M/Z 74 A) BLANK (BLACK<br>LINE) B) SAMPLE SOLUTION OF SUNITINIB (PINK LINE) C) REFERENCE SAMPLE<br>SOLUTION - SUNITINIB SPIKED WITH THE STANDARD SOLUTION OF NITROSAMINES<br>AT CONCENTRATION LEVEL OF 18.0 NG/ML (BLUE LINE) (CAL 100%).        | 20 |
| FIGURE S2. COMPARISON OF CHROMATOGRAMS FOR NMEA M/Z 88 A) BLANK (BLACK<br>LINE) B) SAMPLE SOLUTION OF SUNITINIB (PINK LINE) C) REFERENCE SAMPLE<br>SOLUTION SUNITINIB SPIKED WITH THE STANDARD SOLUTION OF NITROSAMINES AT<br>CONCENTRATION LEVEL OF 18.0 NG/ML (BLUE LINE) (CAL 100%).          | 20 |
| FIGURE S3. COMPARISON OF CHROMATOGRAMS FOR NDEA M/Z 102 A) BLANK (BLACK<br>LINE) B) SAMPLE SOLUTION OF SUNITINIB (PINK LINE) C) REFERENCE SAMPLE<br>SOLUTION SUNITINIB SPIKED WITH THE STANDARD SOLUTION OF NITROSAMINES AT<br>CONCENTRATION LEVEL OF 18.0 NG/ML (BLUE LINE) (CAL 100%).         | 21 |
| FIGURE S4. COMPARISON OF CHROMATOGRAMS FOR NDPA M/Z 130 A) BLANK (BLACK<br>LINE) B) SAMPLE SOLUTION OF SUNITINIB (PINK LINE) C) REFERENCE SAMPLE<br>SOLUTION SUNITINIB SPIKED WITH THE STANDARD SOLUTION OF NITROSAMINES AT<br>CONCENTRATION LEVEL OF 18.0 NG/ML (BLUE LINE) (CAL 100%).         | 21 |
| FIGURE S5. COMPARISON OF CHROMATOGRAMS FOR NMOR M/Z 116 A) BLANK (BLACK<br>LINE) B) SAMPLE SOLUTION OF SUNITINIB (PINK LINE) C) REFERENCE SAMPLE<br>SOLUTION SUNITINIB SPIKED WITH THE STANDARD SOLUTION OF NITROSAMINES AT<br>CONCENTRATION LEVEL OF 18.0 NG/ML (BLUE LINE) (CAL 100%).         | 22 |
| FIGURE S6. COMPARISON OF CHROMATOGRAMS FOR NPYR M/Z 100 A) BLANK (BLACK<br>LINE) B) SAMPLE SOLUTION OF SUNITINIB (PINK LINE) C) REFERENCE SAMPLE<br>SOLUTION SUNITINIB SPIKED WITH THE STANDARD SOLUTION OF NITROSAMINES AT<br>CONCENTRATION LEVEL OF 18.0 NG/ML (BLUE LINE) (CAL 100%).         | 22 |
| FIGURE S7. COMPARISON OF CHROMATOGRAMS FOR NPIP M/Z 114 A) BLANK (BLACK LINE)<br>B) SAMPLE SOLUTION OF SUNITINIB (PINK LINE) C) REFERENCE SAMPLE SOLUTION<br>SUNITINIB SPIKED WITH THE STANDARD SOLUTION OF NITROSAMINES AT<br>CONCENTRATION LEVEL OF 18.0 NG/ML (BLUE LINE) (CAL 100%).         | 23 |
| FIGURE S8. COMPARISON OF CHROMATOGRAMS FOR NDBA M/Z 158 A) BLANK (BLACK<br>LINE) B) SAMPLE SOLUTION OF SUNITINIB (PINK LINE) C) REFERENCE SAMPLE<br>SOLUTION SUNITINIB SPIKED WITH THE STANDARD SOLUTION OF NITROSAMINES AT<br>CONCENTRATION LEVEL OF 18.0 NG/ML (BLUE LINE) (CAL 100%).         | 23 |
| FIGURE S9. COMPARISON OF CHROMATOGRAMS FOR N-METHYL-NPZ M/Z =99 A) BLANK<br>(BLACK LINE) B) SAMPLE SOLUTION OF SUNITINIB (PINK LINE) C) REFERENCE SAMPLE<br>SOLUTION SUNITINIB SPIKED WITH THE STANDARD SOLUTION OF NITROSAMINES AT<br>CONCENTRATION LEVEL OF 18.0 NG/ML (BLUE LINE) (CAL 100%). | 24 |
| FIGURE S10. COMPARISON OF CHROMATOGRAMS FOR NDMA M/Z 74 A) BLANK (BLACK<br>LINE) B) SAMPLE SOLUTION OF CILOSTAZOL (PINK LINE) C) REFERENCE SAMPLE<br>SOLUTION CILOSTAZOL SPIKED WITH THE STANDARD SOLUTION OF NITROSAMINES<br>AT CONCENTRATION LEVEL OF 18.0 NG/ML (BLUE LINE) (CAL 100%).       | 24 |

FIGURE S11. COMPARISON OF CHROMATOGRAMS FOR NMEA M/Z 88 A) BLANK (BLACK LINE) B) SAMPLE SOLUTION OF CILOSTAZOL (PINK LINE) C) REFERENCE SAMPLE SOLUTION CILOSTAZOL SPIKED WITH THE STANDARD SOLUTION OF NITROSAMINES AT CONCENTRATION LEVEL OF 18.0 NG/ML (BLUE LINE) (CAL 100%). 25

FIGURE S12. COMPARISON OF CHROMATOGRAMS FOR NDEA M/Z 102 A) BLANK (BLACK LINE) B) SAMPLE SOLUTION OF CILOSTAZOL (PINK LINE) C) REFERENCE SAMPLE SOLUTION CILOSTAZOL SPIKED WITH THE STANDARD SOLUTION OF NITROSAMINES AT CONCENTRATION LEVEL OF 18.0 NG/ML (BLUE LINE) (CAL 100%). 25

FIGURE S13. COMPARISON OF CHROMATOGRAMS FOR NDPA M/Z 130 A) BLANK (BLACK LINE) B) SAMPLE SOLUTION OF CILOSTAZOL (PINK LINE) C) REFERENCE SAMPLE SOLUTION CILOSTAZOL SPIKED WITH THE STANDARD SOLUTION OF NITROSAMINES AT CONCENTRATION LEVEL OF 18.0 NG/ML (BLUE LINE) (CAL 100%). 26

FIGURE S14. COMPARISON OF CHROMATOGRAMS FOR NMOR M/Z 116 A) BLANK (BLACK LINE) B) SAMPLE SOLUTION OF CILOSTAZOL (PINK LINE) C) REFERENCE SAMPLE SOLUTION CILOSTAZOL SPIKED WITH THE STANDARD SOLUTION OF NITROSAMINES AT CONCENTRATION LEVEL OF 18.0 NG/ML (BLUE LINE) (CAL 100%). 26

FIGURE S15. COMPARISON OF CHROMATOGRAMS FOR NPYR M/Z 100 A) BLANK (BLACK LINE) B) SAMPLE SOLUTION OF CILOSTAZOL (PINK LINE) C) REFERENCE SAMPLE SOLUTION CILOSTAZOL SPIKED WITH THE STANDARD SOLUTION OF NITROSAMINES AT CONCENTRATION LEVEL OF 18.0 NG/ML (BLUE LINE) (CAL 100%). 27

FIGURE S16. COMPARISON OF CHROMATOGRAMS FOR NPIP M/Z 114 A) BLANK (BLACK LINE) B) SAMPLE SOLUTION OF CILOSTAZOL (PINK LINE) C) REFERENCE SAMPLE SOLUTION CILOSTAZOL SPIKED WITH THE STANDARD SOLUTION OF NITROSAMINES AT CONCENTRATION LEVEL OF 18.0 NG/ML (BLUE LINE) (CAL 100%). 27

FIGURE S17. COMPARISON OF CHROMATOGRAMS FOR NDBA M/Z 158 A) BLANK (BLACK LINE) B) SAMPLE SOLUTION OF CILOSTAZOL (PINK LINE) C) REFERENCE SAMPLE SOLUTION CILOSTAZOL SPIKED WITH THE STANDARD SOLUTION OF NITROSAMINES AT CONCENTRATION LEVEL OF 18.0 NG/ML (BLUE LINE) (CAL 100%). 28

FIGURE S18. COMPARISON OF CHROMATOGRAMS FOR N-METHYL-NPZ M/Z 99 A) BLANK (BLACK LINE) B) SAMPLE SOLUTION OF CILOSTAZOL (PINK LINE) C) REFERENCE SAMPLE SOLUTION CILOSTAZOL SPIKED WITH THE STANDARD SOLUTION OF NITROSAMINES AT CONCENTRATION LEVEL OF 18.0 NG/ML (BLUE LINE) (CAL 100%). 28

FIGURE S19. COMPARISON OF CHROMATOGRAMS FOR NDMA M/Z 74 A) BLANK (BLACK LINE) B) SAMPLE SOLUTION OF OLMESARTAN MEDOXOMIL (PINK LINE) C) REFERENCE SAMPLE SOLUTION OLMESARTAN MEDOXOMIL SPIKED WITH THE STANDARD SOLUTION OF NITROSAMINES AT CONCENTRATION LEVEL OF 18.0 NG/ML (BLUE LINE) (CAL 100%). 29

FIGURE S20. COMPARISON OF CHROMATOGRAMS FOR NMEA M/Z 88 A) BLANK (BLACK LINE) B) SAMPLE SOLUTION OF OLMESARTAN MEDOXOMIL (PINK LINE) C) REFERENCE SAMPLE SOLUTION OLMESARTAN MEDOXOMIL SPIKED WITH THE STANDARD SOLUTION OF NITROSAMINES AT CONCENTRATION LEVEL OF 18.0 NG/ML (BLUE LINE) (CAL 100%). 29

FIGURE S21. COMPARISON OF CHROMATOGRAMS FOR NDEA M/Z 102 A) BLANK (BLACK LINE) B) SAMPLE SOLUTION OF OLMESARTAN MEDOXOMIL (PINK LINE) C) REFERENCE SAMPLE SOLUTION OLMESARTAN MEDOXOMIL SPIKED WITH THE

|                                                                                                                                                                                                                                                                                                              |    |
|--------------------------------------------------------------------------------------------------------------------------------------------------------------------------------------------------------------------------------------------------------------------------------------------------------------|----|
| STANDARD SOLUTION OF NITROSAMINES AT CONCENTRATION LEVEL OF 18.0 NG/ML (BLUE LINE) (CAL 100%).                                                                                                                                                                                                               | 30 |
| FIGURE S22. COMPARISON OF CHROMATOGRAMS FOR NDPA M/Z 130 A) BLANK (BLACK LINE) B) SAMPLE SOLUTION OF OLMESARTAN MEDOXOMIL (PINK LINE) C) REFERENCE SAMPLE SOLUTION OLMESARTAN MEDOXOMIL SPIKED WITH THE STANDARD SOLUTION OF NITROSAMINES AT CONCENTRATION LEVEL OF 18.0 NG/ML (BLUE LINE) (CAL 100%).       | 30 |
| FIGURE S23. COMPARISON OF CHROMATOGRAMS FOR NMOR M/Z 116 A) BLANK (BLACK LINE) B) SAMPLE SOLUTION OF OLMESARTAN MEDOXOMIL (PINK LINE) C) REFERENCE SAMPLE SOLUTION OLMESARTAN MEDOXOMIL SPIKED WITH THE STANDARD SOLUTION OF NITROSAMINES AT CONCENTRATION LEVEL OF 18.0 NG/ML (BLUE LINE) (CAL 100%).       | 31 |
| FIGURE S24. COMPARISON OF CHROMATOGRAMS FOR NPYR M/Z 100 A) BLANK (BLACK LINE) B) SAMPLE SOLUTION OF OLMESARTAN MEDOXOMIL (PINK LINE) C) REFERENCE SAMPLE SOLUTION OLMESARTAN MEDOXOMIL SPIKED WITH THE STANDARD SOLUTION OF NITROSAMINES AT CONCENTRATION LEVEL OF 18.0 NG/ML (BLUE LINE) (CAL 100%).       | 31 |
| FIGURE S25. COMPARISON OF CHROMATOGRAMS FOR NPIP M/Z 114 A) BLANK (BLACK LINE) B) SAMPLE SOLUTION OF OLMESARTAN MEDOXOMIL (PINK LINE) C) REFERENCE SAMPLE SOLUTION OLMESARTAN MEDOXOMIL SPIKED WITH THE STANDARD SOLUTION OF NITROSAMINES AT CONCENTRATION LEVEL OF 18.0 NG/ML (BLUE LINE) (CAL 100%).       | 32 |
| FIGURE S26. COMPARISON OF CHROMATOGRAMS FOR NDBA M/Z 158 A) BLANK (BLACK LINE) B) SAMPLE SOLUTION OF OLMESARTAN MEDOXOMIL (PINK LINE) C) REFERENCE SAMPLE SOLUTION OLMESARTAN MEDOXOMIL SPIKED WITH THE STANDARD SOLUTION OF NITROSAMINES AT CONCENTRATION LEVEL OF 18.0 NG/ML (BLUE LINE) (CAL 100%).       | 32 |
| FIGURE S27. COMPARISON OF CHROMATOGRAMS FOR N-METHYL-NPZ M/Z99 A) BLANK (BLACK LINE) B) SAMPLE SOLUTION OF OLMESARTAN MEDOXOMIL (PINK LINE) C) REFERENCE SAMPLE SOLUTION OLMESARTAN MEDOXOMIL SPIKED WITH THE STANDARD SOLUTION OF NITROSAMINES AT CONCENTRATION LEVEL OF 18.0 NG/ML (BLUE LINE) (CAL 100%). | 33 |
| SUPPLEMENTARY NOTE S1 – CALCULATIONS 1                                                                                                                                                                                                                                                                       | 33 |

**Table S1. Results of solubility analyses of sunitinib malate.**

| Solvent  | Sample weight [mg] | Volume of solvent added [ml] | Result           |
|----------|--------------------|------------------------------|------------------|
| water    | 100 mg             | 10 ml                        | Slightly Soluble |
| methanol | 100 mg             | 10 ml                        | Slightly Soluble |

|               |        |        |                       |
|---------------|--------|--------|-----------------------|
| ethanol       | 100 mg | 10 ml  | Slightly Soluble      |
| Propan-2-ol   | 1 mg   | >10 ml | Practically insoluble |
| Hexane        | 1 mg   | >10 ml | Practically insoluble |
| buffer pH 1,2 | 100 mg | 3 ml   | Soluble               |
| buffer pH 7,2 | 100 mg | 3 ml   | Soluble               |
| buffer pH 9,2 | 100 mg | 3 ml   | Soluble               |
| buffer pH 9,5 | 100mg  | 10ml   | Slightly Soluble      |

**Table S2.Results of solubility analyses of olmesartan medoxomil.**

| <b>Solvent</b>      | <b>Sample weight [mg]</b> | <b>Volume of solvent added [ml]</b> | <b>Result</b>         |
|---------------------|---------------------------|-------------------------------------|-----------------------|
| <b>water</b>        | <1                        | 10                                  | Practically insoluble |
| <b>etanol</b>       | 10                        | 10                                  | slightly soluble      |
| <b>heptane</b>      | <1                        | 10                                  | Practically insoluble |
| <b>acetonitrile</b> | 10                        | 10                                  | slightly soluble      |
| <b>methanol</b>     | 10                        | 10                                  | slightly soluble      |
| <b>DMSO</b>         | 100                       | 1                                   | freely soluble        |

**Table S3.Results of solubility analyses of cilostazol.**

| <b>Solvent</b> | <b>Sample weight [mg]</b> | <b>Volume of solvent added [ml]</b> | <b>Result</b>         |
|----------------|---------------------------|-------------------------------------|-----------------------|
| water          | <1                        | 10                                  | Practically insoluble |
| methanol       | 10                        | 10                                  | slightly soluble      |
| 2-propanol     | 1                         | 10                                  | Very Slightly Soluble |
| Acetic acid    | 100                       | 1                                   | Freely soluble        |
| DMSO           | 100                       | 3                                   | soluble               |
| hexan          | <1                        | 10                                  | Practically insoluble |

|                |    |    |                       |
|----------------|----|----|-----------------------|
| acetonitrile   | 10 | 10 | slightly soluble      |
| buffer pH 1,23 | <1 | 10 | Practically insoluble |
| buffer pH 4,58 | <1 | 10 | Practically insoluble |
| buffer pH 7,25 | <1 | 10 | Practically insoluble |
| buffer pH 9,5  | <1 | 10 | Practically insoluble |

**Table S4. Experimental design for optimizing the extraction conditions.**

| Experiment No. | methanol    | Centrifuge Speed<br>[rpm] | Centrifuge<br>time [min] | Result<br>Mean Recovery* [%]         |
|----------------|-------------|---------------------------|--------------------------|--------------------------------------|
| 1              | 250 $\mu$ L | 15000                     | 2                        | volume too<br>small for GC injection |
| 2              | 250 $\mu$ L | 15000                     | 5                        | 98.76%<br>about 100ul<br>extracted   |
| 3              | 250uL       | 15000                     | 7                        | 99.07%<br>about 150ul<br>extracted   |
| 4              | 250ul       | 15000                     | 10                       | 99.38% about<br>220 ul extracted     |
| 4              | 250 $\mu$ L | 5000                      | 10                       | volume too<br>small for GC injection |
| 5              | 250 $\mu$ L | 10000                     | 10                       | volume too<br>small for GC injection |

\*Recovery = (Area nitrosamine /Area NDMA-d6 for sample solution with nitrosamine at 100% concentration level after extraction)/(Area nitrosamine /Area NDMA-d6 for nitrosamine at 100% of the specification limit)

**Table S5. Comparison of the results of this publication with various reported GC-MS and GC-MS/MS methods for the detection of nitrosamines.**

| No. | Method / API                 | Nitrosamines                                                 | Linearity/ Range                                                                                                                          | Accuracy                           | Precision                                                  | LOD/LOQ [ppb]                                                                                                                                                                                                                                            | Ref.   |
|-----|------------------------------|--------------------------------------------------------------|-------------------------------------------------------------------------------------------------------------------------------------------|------------------------------------|------------------------------------------------------------|----------------------------------------------------------------------------------------------------------------------------------------------------------------------------------------------------------------------------------------------------------|--------|
| 1   | HS-SPME-GC-MS/<br>ranitidine | NDMA                                                         | R: 0.998<br>5–100 ppb                                                                                                                     | -                                  | RSD=20%<br>(5ppb)                                          | LOD=1<br>LOQ=5                                                                                                                                                                                                                                           | [1][1] |
| 2   | DLLME-GC-MS/<br>ranitidine   | NDMA NEMA<br>NDEA<br>NPYR<br>NMOR NDPA<br>NPIP<br>NDBA NDPhA | R <sup>2</sup> >0.99<br>NDMA :30-3000 ppb<br>NMOR:15-3000 ppb<br>NEMA.<br>NPYR:3-3000 ppb<br>NDEA.<br>NDPA.<br>NPIP.<br>NDBA:0.5-3000 ppb | 80.2 and 102%<br>(n=36) for 50 ppb | RSD<12%<br>(reproducibility)<br>RSD<10%<br>(repeatability) | LOQ <sub>NDMA</sub> =21<br>LOQ <sub>NMEA</sub> =11<br>LOQ <sub>NDEA</sub> =0.96<br>LOQ <sub>NPYR</sub> =8.4<br>LOQ <sub>NMOR</sub> =17<br>LOQ <sub>NDPA</sub> =1.1<br>LOQ <sub>NPIP</sub> =1.6<br>LOQ <sub>NDBA</sub> =1.1<br>LOQ <sub>NDPhA</sub> =0.21 | [2]    |
| 3   | GC-MS/MS/<br>sartans         | NDMA<br>NDEA<br>NDBA<br>NDIPA                                | R <sup>2</sup> >0.99<br>NDMA: 0.8-60 ppb<br>NDEA: 0.8-16 ppb<br>NDIPA: 3-60 ppb<br>NDBA: 6-60 ppb                                         | 87.68-123.76%                      | Intraday:<br>1.45-6.38%<br>Interday:<br>2.88-9.15%         | LOD=2 -150<br>LOQ= 8-500                                                                                                                                                                                                                                 | [3]    |

|   |                                                             |                                |                                                                           |                                            |                                                                            |                                                                                                                        |     |
|---|-------------------------------------------------------------|--------------------------------|---------------------------------------------------------------------------|--------------------------------------------|----------------------------------------------------------------------------|------------------------------------------------------------------------------------------------------------------------|-----|
|   |                                                             |                                |                                                                           |                                            |                                                                            |                                                                                                                        |     |
| 4 | SPE-GC-MS/MS/<br>sartans,<br>ranitidine<br>and<br>metformin | NDMA<br>NDEA                   | R <sup>2</sup> =1.000<br><br>NDEA: 0.3-1000 ppb<br><br>NDMA: 0.9-1000 ppb | NDMA:<br>95-105%<br><br>NDEA:<br>93.6-104% | RSD <sub>NDEA</sub> :<br>0.4-4.2%<br><br>RSD <sub>NDMA</sub> :<br>0.4-2.7% | LOQ= 0.3-0.9 ppb                                                                                                       | [4] |
| 5 | GC-MS/Valsartan                                             | NDMA                           | R>0.999<br>5-200ppb                                                       | -                                          | RSD: 1.9%<br>(n=5)                                                         | LOD=1ppb                                                                                                               | [5] |
| 6 | HS-GC-MS/MS<br>/valsartan                                   | NDMA<br>NDEA<br>NEIPA<br>NDIPA | R≥0.995                                                                   | -                                          | -                                                                          | LOD <sub>NDMA</sub> =10<br><br>LOD <sub>NDEA</sub> =10<br><br>LOD <sub>NEIPA</sub> =25<br><br>LOD <sub>NDIPA</sub> =25 | [6] |
| 7 | GC-MS/ranitidine                                            | NDMA                           | R <sup>2</sup><br>= 0.99986                                               | -                                          | -                                                                          | LOD <sub>NDMA</sub> =5.9<br><br>LOQ <sub>NDMA</sub> =19.8                                                              | [7] |
| 8 | HS-GC-MS/losartan                                           | NDMA<br>NDEA<br>EIPNA<br>DIPNA | R <sup>2</sup> >0.999<br>25-5000ppb                                       | -                                          | RSD<11.5%                                                                  | LOQ <sub>NDMA.NDEA</sub> =25<br><br>LOQ <sub>EIPNA.DIPNA</sub> =50                                                     | [8] |
| 9 | SF-HS-GC/MS/<br>Drug products                               | NDMA                           | R>0.9999<br>5-500ppb                                                      | 92.77-106.54%                              | RSD:1.20-5.94%                                                             | LOQ=5                                                                                                                  | [9] |



|    |                                                         |                                                                                          |                                       |                   |           |                   |              |
|----|---------------------------------------------------------|------------------------------------------------------------------------------------------|---------------------------------------|-------------------|-----------|-------------------|--------------|
|    | /ranitidine                                             |                                                                                          |                                       |                   |           |                   |              |
| 10 | GC-MS<br>/cilostazol,s<br>unitinib<br>and<br>olmesartan | NDMA<br><br>NMEA<br><br>NDEA<br><br>NDPA<br><br>NMOR<br><br>NPYR<br><br>NPIP<br><br>NDBA | $R^2 > 0.995$<br><br>0.15-21.6<br>ppb | 94.09-<br>111.22% | RSD<7.65% | LOD:0.15-<br>1ppb | This<br>work |

**Table S6.The results of the robustness for nine nitrosamines.**

| Changed<br>parameters             | Retention time (min) |       |       |        |        |        |        |        |              |
|-----------------------------------|----------------------|-------|-------|--------|--------|--------|--------|--------|--------------|
|                                   | NDMA                 | NMEA  | NDEA  | NDPA   | NMOR   | NPYR   | NPIP   | NDBA   | N-methyl-npz |
| Main method                       | 7.611                | 8.383 | 8.872 | 11.051 | 15.464 | 14.786 | 14.358 | 13.733 | 15.690       |
| Column<br>temperature<br>75→70°C  | 8.140                | 8.914 | 9.405 | 11.597 | 16.017 | 15.339 | 14.909 | 14.287 | 16.244       |
| Column<br>temperature<br>75→80°C  | 7.082                | 7.852 | 8.339 | 10.506 | 14.909 | 14.234 | 13.807 | 13.183 | 15.139       |
| Rate 8°C/min                      | 7.894                | 8.737 | 9.273 | 11.683 | 16.579 | 15.814 | 15.329 | 14.668 | 16.822       |
| Rate 10°C/min                     | 7.310                | 8.074 | 8.525 | 11.519 | 14.536 | 13.930 | 13.547 | 12.955 | 14.758       |
| Carrier gas<br>pressure 41<br>kPa | 7.724                | 8.501 | 8.992 | 11.177 | 15.600 | 14.926 | 14.498 | 13.866 | 15.831       |

|                                   |       |       |       |        |        |        |        |        |        |
|-----------------------------------|-------|-------|-------|--------|--------|--------|--------|--------|--------|
| Carrier gas<br>pressure 50<br>kPa | 7.498 | 8.268 | 8.754 | 10.928 | 15.331 | 14.653 | 14.223 | 13.611 | 15.556 |
|-----------------------------------|-------|-------|-------|--------|--------|--------|--------|--------|--------|

**Table S7.Results of system precision for NDMA.**

|      | Solution with NDMA at 100%<br>of the specification limit |                      |
|------|----------------------------------------------------------|----------------------|
|      | Area<br>NDMA/Area<br>NDMA-d6 (Q)                         | Retention time (min) |
| 1    | 0.224950                                                 | 7.610                |
| 2    | 0.224810                                                 | 7.611                |
| 3    | 0.224619                                                 | 7.608                |
| 4    | 0.229979                                                 | 7.606                |
| 5    | 0.231007                                                 | 7.610                |
| 6    | 0.229457                                                 | 7.607                |
| Mean | 0.227                                                    | 7.609                |
| SD   | 0.003                                                    | 0.002                |
| RSD% | 1.309                                                    | 0.026                |

**Table S8.Results of system precision for NMEA.**

|  | Solution with NMEA at 100%<br>of the specification limit |                      |
|--|----------------------------------------------------------|----------------------|
|  | Area<br>NMEA/Area<br>NDMA-d6 (Q)                         | Retention time (min) |

|      |          |       |
|------|----------|-------|
| 1    | 0.186375 | 8.383 |
| 2    | 0.187098 | 8.383 |
| 3    | 0.192178 | 8.381 |
| 4    | 0.188010 | 8.379 |
| 5    | 0.188924 | 8.382 |
| 6    | 0.189251 | 8.380 |
| Mean | 0.189    | 8.381 |
| SD   | 0.002    | 0.002 |
| RSD% | 1.083    | 0.019 |

**Table S9.Results of system precision for NDEA.**

|      | Solution with NDEA at 100%<br>of the specification limit |                      |
|------|----------------------------------------------------------|----------------------|
|      | Area<br>NDEA/Area<br>NDMA-d6 (Q)                         | Retention time (min) |
| 1    | 0.157667                                                 | 8.871                |
| 2    | 0.157493                                                 | 8.872                |
| 3    | 0.161073                                                 | 8.870                |
| 4    | 0.161134                                                 | 8.869                |
| 5    | 0.160501                                                 | 8.872                |
| 6    | 0.162765                                                 | 8.869                |
| Mean | 0.160                                                    | 8.871                |
| SD   | 0.002                                                    | 0.001                |
| RSD% | 1.310                                                    | 0.016                |

**Table S10.Results of system precision for NDPA.**

|  |                            |
|--|----------------------------|
|  | Solution with NDPA at 100% |
|--|----------------------------|

|      | of the specification limit   |                      |
|------|------------------------------|----------------------|
|      | Area<br>NDPA/Area<br>NDMA-d6 | Retention time (min) |
| 1    | 0.052283                     | 11.051               |
| 2    | 0.051608                     | 11.053               |
| 3    | 0.052613                     | 11.051               |
| 4    | 0.052650                     | 11.049               |
| 5    | 0.052059                     | 11.051               |
| 6    | 0.053165                     | 11.050               |
| Mean | 0.052                        | 11.051               |
| SD   | 0.001                        | 0.001                |
| RSD% | 1.028                        | 0.012                |

**Table S11.Results of system precision for NMOR.**

|      | Solution with NMOR at 100%<br>of the specification limit |                      |
|------|----------------------------------------------------------|----------------------|
|      | Area<br>NMOR/Area<br>NDMA-d6                             | Retention time (min) |
| 1    | 0.067756                                                 | 15.463               |
| 2    | 0.068651                                                 | 15.465               |
| 3    | 0.073053                                                 | 15.464               |
| 4    | 0.069254                                                 | 15.463               |
| 5    | 0.068313                                                 | 15.465               |
| 6    | 0.073295                                                 | 15.462               |
| Mean | 0.070                                                    | 15.464               |
| SD   | 0.002                                                    | 0.001                |
| RSD% | 3.521                                                    | 0.008                |

**Table S12.Results of system precision for NPYR.**

|      | Solution with NPYR at 100%<br>of the specification limit |                      |
|------|----------------------------------------------------------|----------------------|
|      | Area<br>NPYR/Area<br>NDMA-d6                             | Retention time (min) |
| 1    | 0.148465                                                 | 14.787               |
| 2    | 0.154245                                                 | 14.787               |
| 3    | 0.158070                                                 | 14.786               |
| 4    | 0.150725                                                 | 14.787               |
| 5    | 0.150951                                                 | 14.787               |
| 6    | 0.156434                                                 | 14.786               |
| Mean | 0.153                                                    | 14.787               |
| SD   | 0.004                                                    | 0.001                |
| RSD% | 2.423                                                    | 0.003                |

**Table S13.Results of system precision for NPIP.**

|   | Solution with NPIP at 100%<br>of the specification limit |                      |
|---|----------------------------------------------------------|----------------------|
|   | Area<br>NPIP/Area<br>NDMA-d6                             | Retention time (min) |
| 1 | 0.155312                                                 | 14.358               |
| 2 | 0.158814                                                 | 14.360               |
| 3 | 0.162168                                                 | 14.357               |
| 4 | 0.159895                                                 | 14.359               |
| 5 | 0.158157                                                 | 14.359               |
| 6 | 0.164522                                                 | 14.356               |

|      |       |        |
|------|-------|--------|
| Mean | 0.160 | 14.358 |
| SD   | 0.003 | 0.001  |
| RSD% | 2.013 | 0.010  |

**Table S14.Results of system precision for NDBA.**

|      | Solution with NDBA at 100%<br>of the specification limit |                      |
|------|----------------------------------------------------------|----------------------|
|      | Area<br>NDBA/Area<br>NDMA-d6                             | Retention time (min) |
| 1    | 0.054702                                                 | 13.733               |
| 2    | 0.057474                                                 | 13.736               |
| 3    | 0.058570                                                 | 13.735               |
| 4    | 0.057383                                                 | 13.734               |
| 5    | 0.055618                                                 | 13.735               |
| 6    | 0.059367                                                 | 13.733               |
| Mean | 0.057                                                    | 13.734               |
| SD   | 0.002                                                    | 0.001                |
| RSD% | 3.071                                                    | 0.009                |

**Table S15.Results of system precision for N-methyl-npz.**

|  | Solution with NDMA at 100%<br>of the specification limit |                      |
|--|----------------------------------------------------------|----------------------|
|  | Area<br>NDMA/Area                                        | Retention time (min) |

|      |          |        |
|------|----------|--------|
|      | NDMA-d6  |        |
| 1    | 0.115483 | 15.691 |
| 2    | 0.117125 | 15.693 |
| 3    | 0.125361 | 15.689 |
| 4    | 0.114147 | 15.691 |
| 5    | 0.122528 | 15.692 |
| 6    | 0.120568 | 15.689 |
| Mean | 0.119    | 15.691 |
| SD   | 0.004    | 0.002  |
| RSD% | 3.648    | 0.010  |

**Table S16.Results of examined sample solution with NDMA at 100% concentration level.**

| API  | Olmesartan<br>medoxomil      | Sunitinib<br>malate          | Cilostazol                   |
|------|------------------------------|------------------------------|------------------------------|
| Time | Area<br>NDMA/Area<br>NDMA-d6 | Area<br>NDMA/Area<br>NDMA-d6 | Area<br>NDMA/Area<br>NDMA-d6 |
| 0 h  | 0.33764                      | 0.21966                      | 0.22978                      |
| 0 h  | 0.33193                      | 0.22031                      | 0.22868                      |
| 24 h | 0.36238                      | 0.22120                      | 0.23358                      |
| 24 h | 0.36151                      | 0.21931                      | 0.22935                      |
| Mean | 0.34836                      | 0.22012                      | 0.23035                      |
| SD   | 0.01586                      | 0.00083                      | 0.00220                      |
| RSD% | 4.55208                      | 0.37721                      | 0.95497                      |

**Table S17.Results of examined sample solution with NMEA at 100% concentration level.**

| API | Olmesartan<br>medoxomil | Sunitinib<br>malate | Cilostazol |
|-----|-------------------------|---------------------|------------|
|-----|-------------------------|---------------------|------------|

| Time | Area<br>NMEA/Area<br>NDMA-d6 | Area<br>NMEA/Area<br>NDMA-d6 | Area<br>NMEA/Area<br>NDMA-d6 |
|------|------------------------------|------------------------------|------------------------------|
| 0 h  | 0.25164                      | 0.18081                      | 0.18665                      |
| 0 h  | 0.24375                      | 0.17944                      | 0.18496                      |
| 24 h | 0.24736                      | 0.18567                      | 0.18353                      |
| 24 h | 0.24555                      | 0.18362                      | 0.18504                      |
| Mean | 0.24708                      | 0.18238                      | 0.18504                      |
| SD   | 0.00338                      | 0.00280                      | 0.00128                      |
| RSD% | 1.36784                      | 1.53378                      | 0.69044                      |

**Table S18.Results of examined sample solution with NDEA at 100% concentration level.**

| API  | Olmesartan<br>medoxomil      | Sunitinib<br>malate          | Cilostazol                   |
|------|------------------------------|------------------------------|------------------------------|
| Time | Area<br>NDEA/Area<br>NDMA-d6 | Area<br>NDEA/Area<br>NDMA-d6 | Area<br>NDEA/Area<br>NDMA-d6 |
| 0 h  | 0.21025                      | 0.15179                      | 0.15861                      |
| 0 h  | 0.21178                      | 0.15428                      | 0.16259                      |
| 24 h | 0.19945                      | 0.16162                      | 0.16569                      |
| 24 h | 0.19923                      | 0.15919                      | 0.17113                      |
| Mean | 0.20518                      | 0.15672                      | 0.16450                      |
| SD   | 0.00677                      | 0.00449                      | 0.00528                      |
| RSD% | 3.30020                      | 2.86280                      | 3.21246                      |

**Table S19.Results of examined sample solution with NDPA at 100% concentration level.**

| API | Olmesartan<br>medoxomil | Sunitinib<br>malate | Cilostazol |
|-----|-------------------------|---------------------|------------|
|-----|-------------------------|---------------------|------------|



| Time | Area<br>NDPA/Area<br>NDMA-d6 | Area<br>NDPA/Area<br>NDMA-d6 | Area<br>NDPA/Area<br>NDMA-d6 |
|------|------------------------------|------------------------------|------------------------------|
| 0 h  | 0.06580                      | 0.04943                      | 0.05064                      |
| 0 h  | 0.06535                      | 0.05042                      | 0.05172                      |
| 24 h | 0.05565                      | 0.05394                      | 0.05714                      |
| 24 h | 0.05746                      | 0.05333                      | 0.05694                      |
| Mean | 0.06106                      | 0.05178                      | 0.05411                      |
| SD   | 0.00526                      | 0.00219                      | 0.00342                      |
| RSD% | 8.61696                      | 4.23476                      | 6.31146                      |

**Table S20.Results of examined sample solution with NMOR at 100% concentration level.**

| API  | Olmesartan<br>medoxomil       | Sunitinib<br>malate              | Cilostazol                     |
|------|-------------------------------|----------------------------------|--------------------------------|
| Time | Area NMOR<br>/Area<br>NDMA-d6 | Area<br>NMOR<br>/Area<br>NDMA-d6 | Area NMOR<br>/Area NDMA-<br>d6 |
| 0 h  | 0.08685                       | 0.08238                          | 0.07029                        |
| 0 h  | 0.08766                       | 0.08049                          | 0.06860                        |
| 24 h | 0.06064                       | 0.09393                          | 0.07726                        |
| 24 h | 0.06674                       | 0.08616                          | 0.07603                        |
| Mean | 0.07547                       | 0.08574                          | 0.07304                        |
| SD   | 0.01383                       | 0.00595                          | 0.00425                        |
| RSD% | 18.32974                      | 6.93809                          | 5.81212                        |

**Table S21.Results of examined sample solution with NPYR at 100% concentration level.**

| API  | Olmesartan<br>medoxomil       | Sunitinib<br>malate              | Cilostazol                     |
|------|-------------------------------|----------------------------------|--------------------------------|
| Time | Area NPYR<br>/Area<br>NDMA-d6 | Area<br>NPYR<br>/Area<br>NDMA-d6 | Area NPYR<br>/Area NDMA-<br>d6 |
| 0 h  | 0.21536                       | 0.14167                          | 0.16174                        |
| 0 h  | 0.18898                       | 0.14495                          | 0.16413                        |
| 24 h | 0.22201                       | 0.17209                          | 0.18963                        |
| 24 h | 0.20827                       | 0.17246                          | 0.18312                        |
| Mean | 0.20866                       | 0.15779                          | 0.17465                        |
| SD   | 0.01426                       | 0.01678                          | 0.01383                        |
| RSD% | 6.83651                       | 10.63381                         | 7.91622                        |

**Table S22. Results of examined sample solution with NPIP at 100% concentration level.**

| API  | Olmesartan<br>medoxomil       | Sunitinib<br>malate           | Cilostazol                     |
|------|-------------------------------|-------------------------------|--------------------------------|
| Time | Area NPIP<br>/Area<br>NDMA-d6 | Area NPIP<br>/Area<br>NDMA-d6 | Area NPIP<br>/Area NDMA-<br>d6 |
| 0 h  | ND                            | 0.16373                       | 0.16830                        |
| 0 h  | ND                            | 0.15047                       | 0.15177                        |
| 24 h | ND                            | 0.16657                       | 0.17921                        |
| 24 h | ND                            | 0.15242                       | 0.18189                        |
| Mean | -                             | 0.15830                       | 0.17029                        |
| SD   | -                             | 0.00803                       | 0.01368                        |
| RSD% | -                             | 5.07573                       | 8.03132                        |

- ND-not detected

**Table S23.Results of examined sample solution with NDBA at 100% concentration level.**

| API  | Olmesartan<br>medoxomil       | Sunitinib<br>malate              | Cilostazol                     |
|------|-------------------------------|----------------------------------|--------------------------------|
| Time | Area NDBA<br>/Area<br>NDMA-d6 | Area<br>NDBA<br>/Area<br>NDMA-d6 | Area NDBA<br>/Area NDMA-<br>d6 |
| 0 h  | 0.02726                       | 0.01963                          | 0.02324                        |
| 0 h  | 0.02624                       | 0.02067                          | 0.02265                        |
| 24 h | 0.01935                       | 0.02328                          | 0.02659                        |
| 24 h | 0.02090                       | 0.02205                          | 0.02489                        |
| Mean | 0.02344                       | 0.02141                          | 0.02434                        |
| SD   | 0.00390                       | 0.00160                          | 0.00177                        |
| RSD% | 16.64789                      | 7.45161                          | 7.27073                        |

**Table S24.Results of examined sample solution with N-methyl-npz at 100% concentration level.**

| API  | Olmesartan<br>medoxomil                   | Sunitinib<br>malate                        | Cilostazol                             |
|------|-------------------------------------------|--------------------------------------------|----------------------------------------|
| Time | Area N-<br>methyl-npz<br>/Area<br>NDMA-d6 | Area N-<br>methyl-<br>npz /Area<br>NDMA-d6 | Area N-methyl-<br>npz /Area<br>NDMA-d6 |
| 0 h  | ND                                        | 0.12766                                    | 0.12340                                |
| 0 h  | ND                                        | 0.12205                                    | 0.12535                                |
| 24 h | ND                                        | 0.12746                                    | 0.14348                                |
| 24 h | ND                                        | 0.13270                                    | 0.14754                                |
| Mean | -                                         | 0.12747                                    | 0.13494                                |
| SD   | -                                         | 0.00435                                    | 0.01234                                |
| RSD% | -                                         | 3.41481                                    | 9.14427                                |

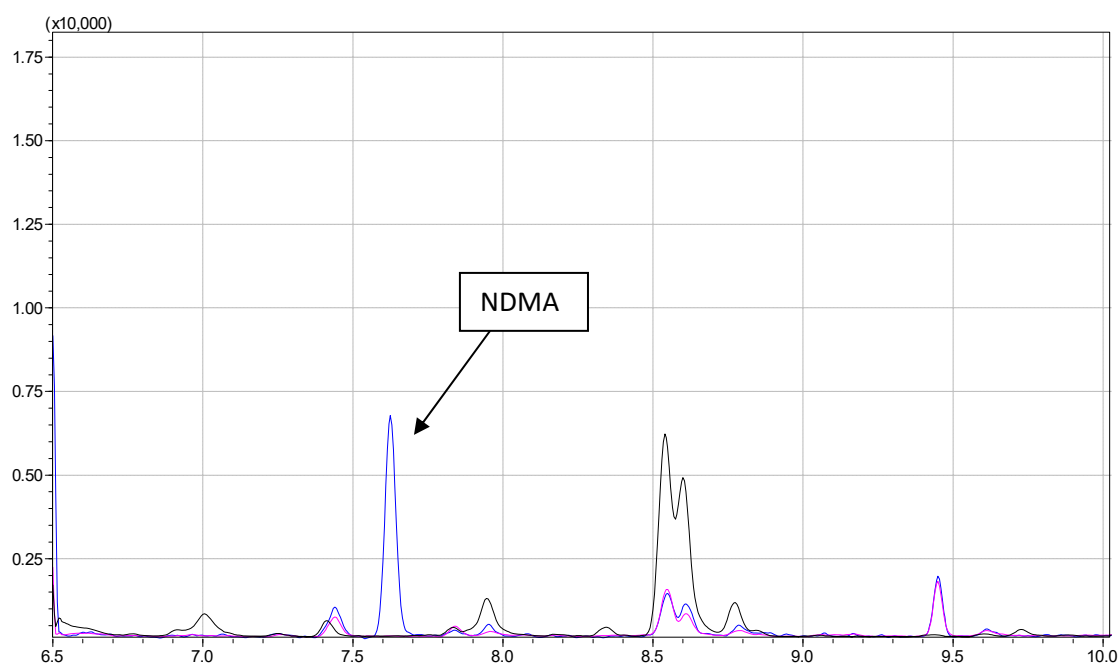

**Figure S1. Comparison of chromatograms for NDMA m/z 74 a) blank (black line) b) sample solution of sunitinib (pink line) c) reference sample solution - sunitinib spiked with the standard solution of nitrosamines at concentration level of 18.0 ng/mL (blue line) (CAL 100%).**

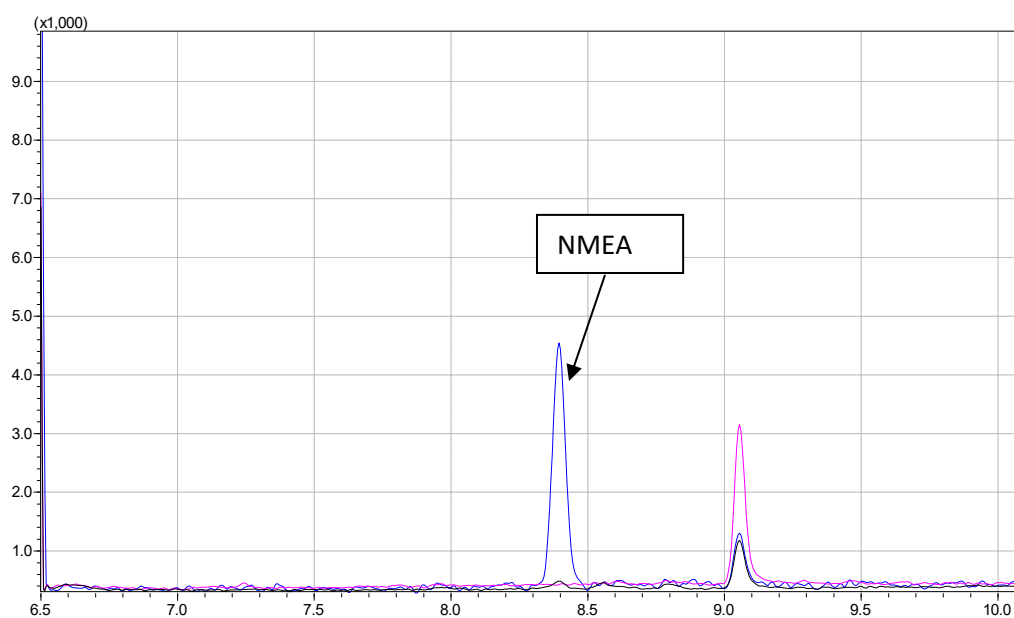

**Figure S2. Comparison of chromatograms for NMEA m/z 88 a) blank (black line) b) sample solution of sunitinib (pink line) c) reference sample solution sunitinib spiked with the standard solution of nitrosamines at concentration level of 18.0 ng/mL (blue line) (CAL 100%).**

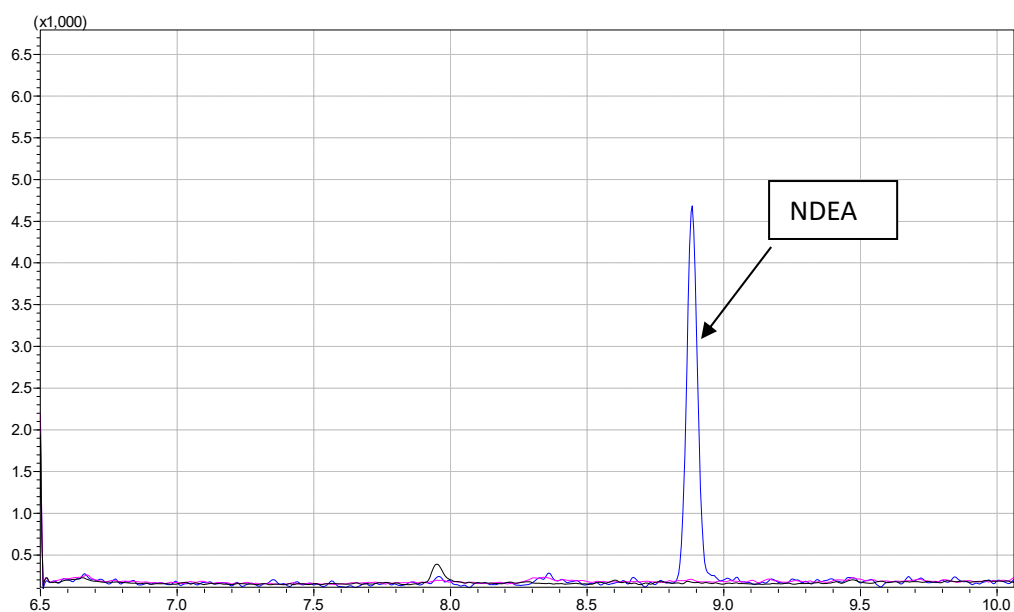

**Figure S3. Comparison of chromatograms for NDEA m/z 102 a) blank (black line) b) sample solution of sunitinib (pink line) c) reference sample solution sunitinib spiked with the standard solution of nitrosamines at concentration level of 18.0 ng/mL (blue line) (CAL 100%).**

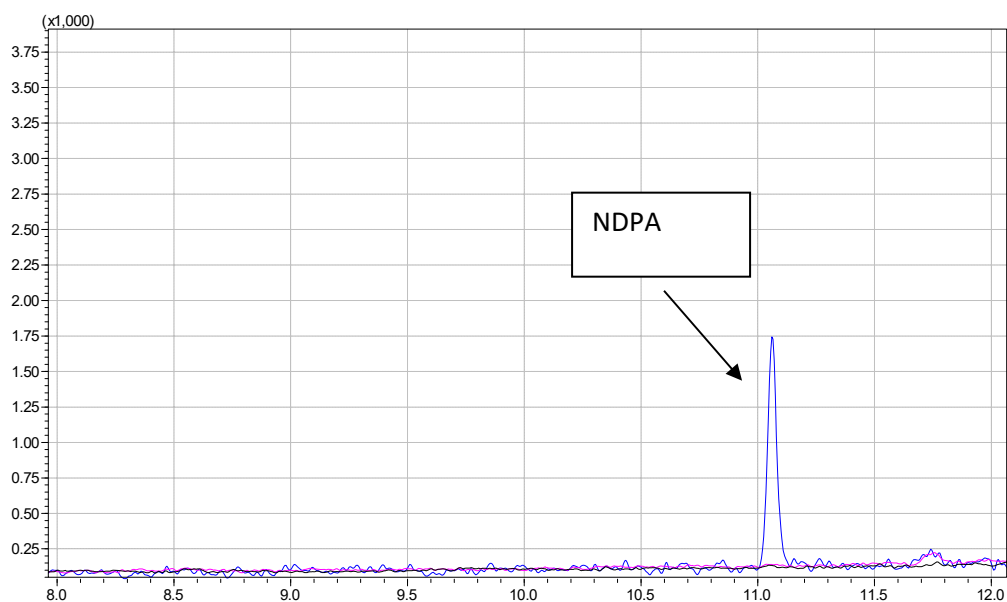

**Figure S4. Comparison of chromatograms for NDPA m/z 130 a) blank (black line) b) sample solution of sunitinib (pink line) c) reference sample solution sunitinib spiked with the standard solution of nitrosamines at concentration level of 18.0 ng/mL (blue line) (CAL 100%).**

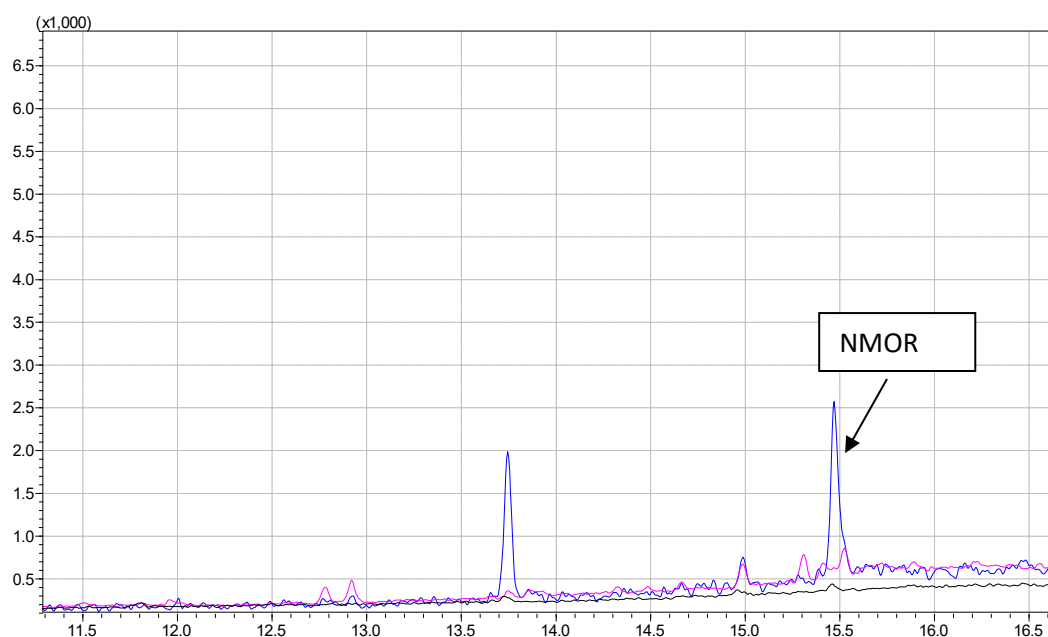

**Figure S5. Comparison of chromatograms for NMOR m/z 116 a) blank (black line) b) sample solution of sunitinib (pink line) c) reference sample solution sunitinib spiked with the standard solution of nitrosamines at concentration level of 18.0 ng/mL (blue line) (CAL 100%).**

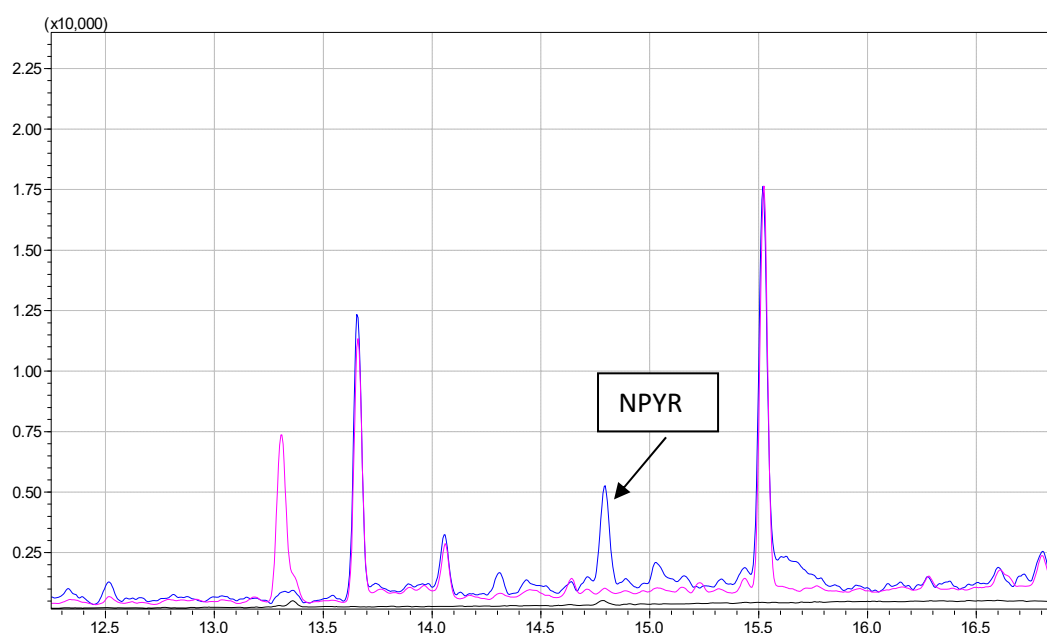

**Figure S6. Comparison of chromatograms for NPYR m/z 100 a) blank (black line) b) sample solution of sunitinib (pink line) c) reference sample solution sunitinib spiked with the standard solution of nitrosamines at concentration level of 18.0 ng/mL (blue line) (CAL 100%).**

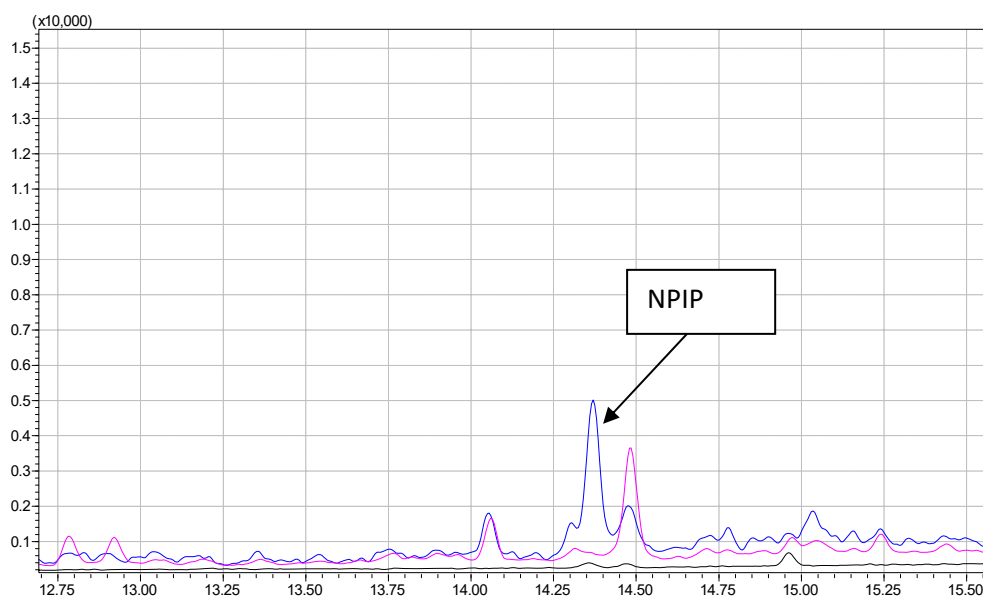

**Figure S7. Comparison of chromatograms for NPIP m/z 114 a) blank (black line) b) sample solution of sunitinib (pink line) c) reference sample solution sunitinib spiked with the standard solution of nitrosamines at concentration level of 18.0 ng/mL (blue line) (CAL 100%).**

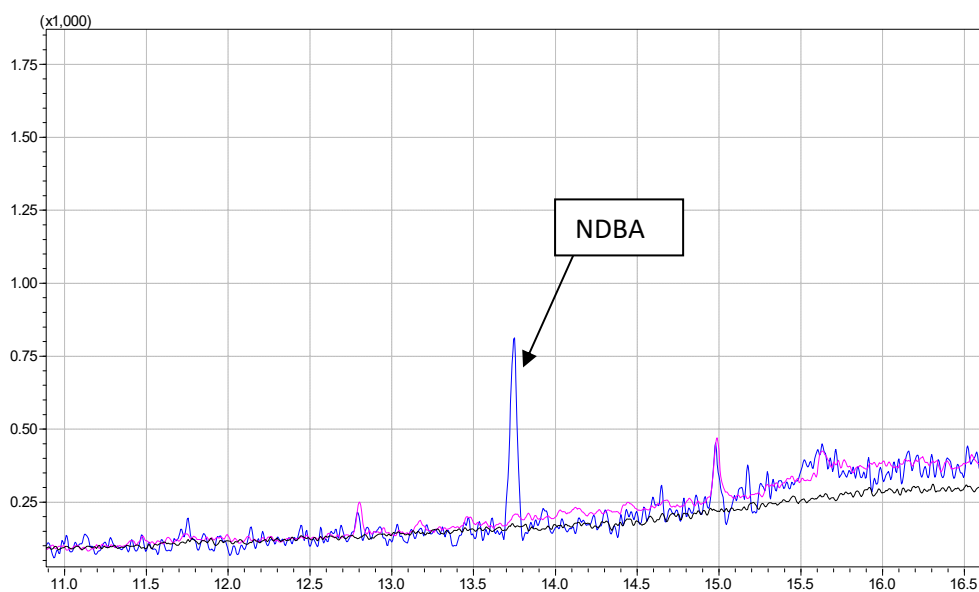

**Figure S8. Comparison of chromatograms for NDBA m/z 158 a) blank (black line) b) sample solution of sunitinib (pink line) c) reference sample solution sunitinib spiked with the standard solution of nitrosamines at concentration level of 18.0 ng/mL (blue line) (CAL 100%).**

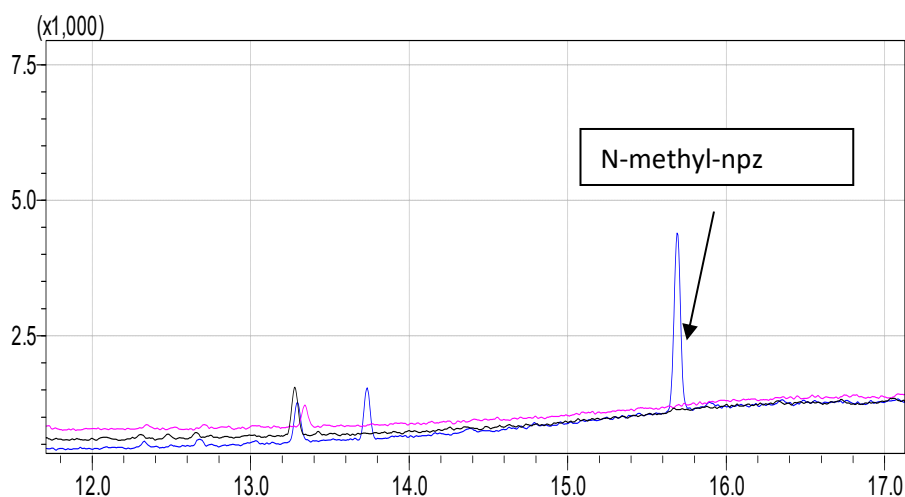

**Figure S9. Comparison of chromatograms for N-methyl-npz m/z =99 a) blank (black line) b) sample solution of sunitinib (pink line) c) reference sample solution sunitinib spiked with the standard solution of nitrosamines at concentration level of 18.0 ng/mL (blue line) (CAL 100%).**

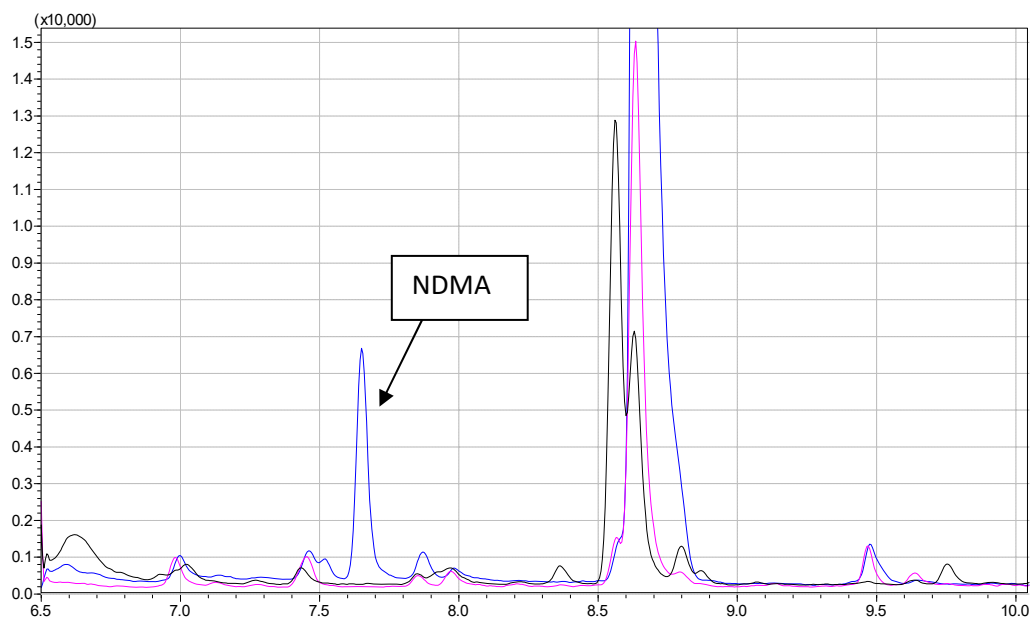

**Figure S10. Comparison of chromatograms for NDMA m/z 74 a) blank (black line) b) sample solution of cilostazol (pink line) c) reference sample solution cilostazol spiked with the standard solution of nitrosamines at concentration level of 18.0 ng/mL (blue line) (CAL 100%).**



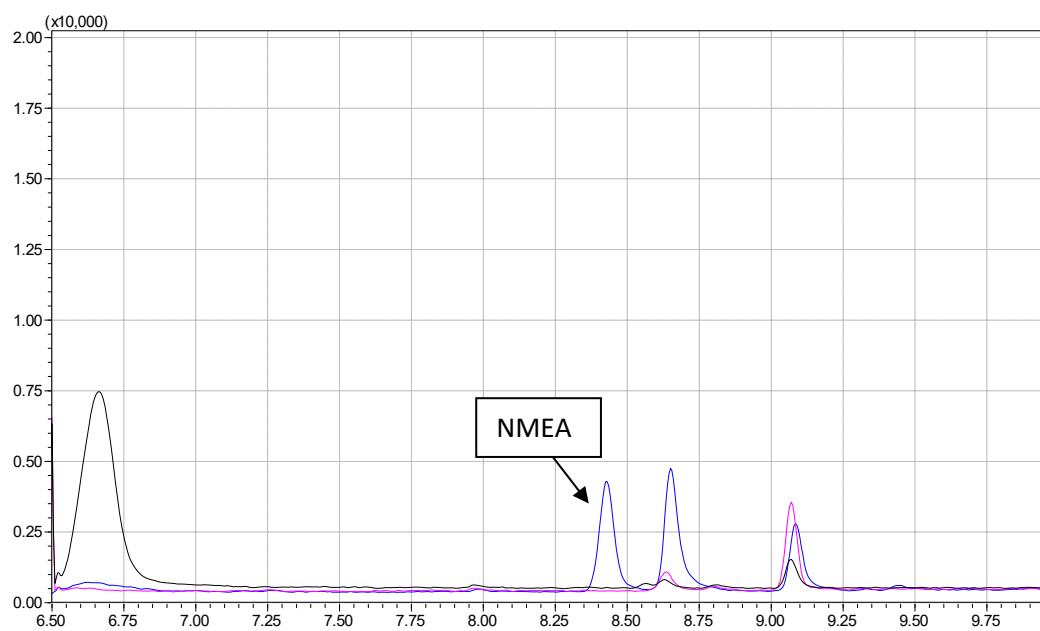

**Figure S11. Comparison of chromatograms for NMEA m/z 88 a) blank (black line) b) sample solution of cilostazol (pink line) c) reference sample solution cilostazol spiked with the standard solution of nitrosamines at concentration level of 18.0 ng/mL (blue line) (CAL 100%).**

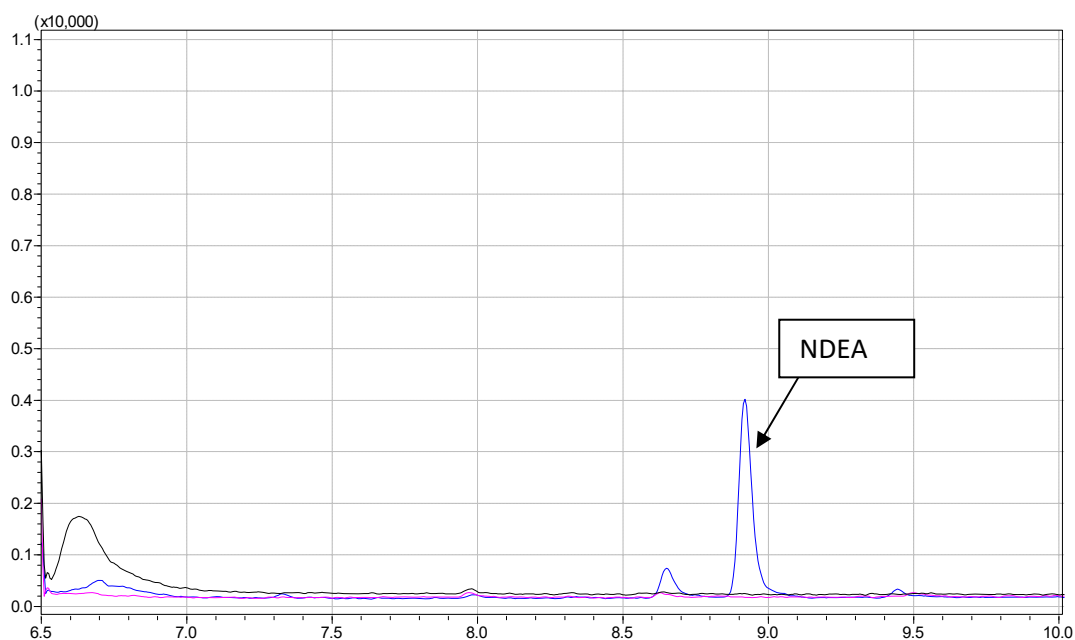

**Figure S12. Comparison of chromatograms for NDEA m/z 102 a) blank (black line) b) sample solution of cilostazol (pink line) c) reference sample solution cilostazol spiked with the standard solution of nitrosamines at concentration level of 18.0 ng/mL (blue line) (CAL 100%).**

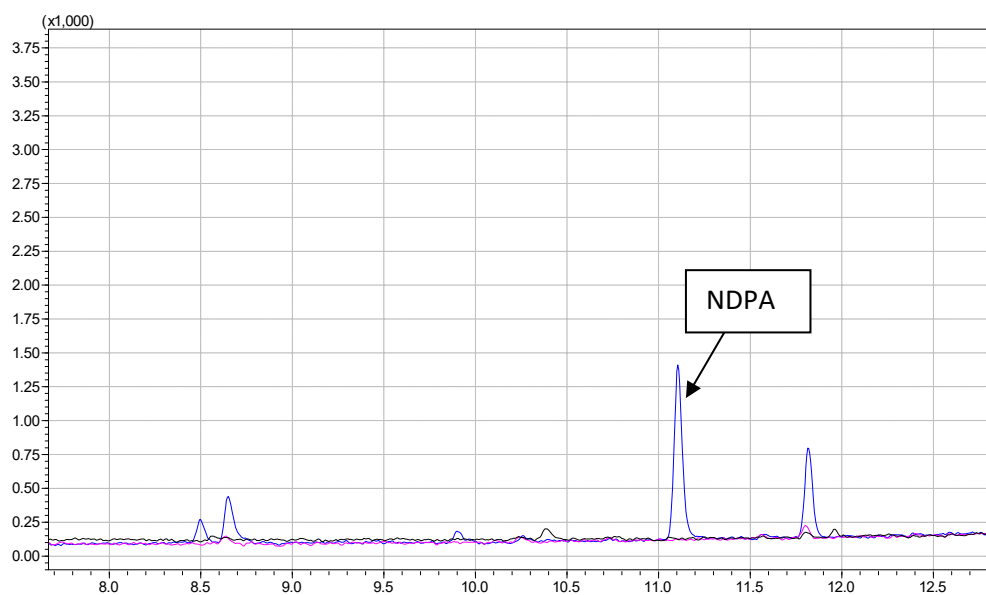

**Figure S13. Comparison of chromatograms for NDPA m/z 130 a) blank (black line) b) sample solution of cilostazol (pink line) c) reference sample solution cilostazol spiked with the standard solution of nitrosamines at concentration level of 18.0 ng/mL (blue line) (CAL 100%).**

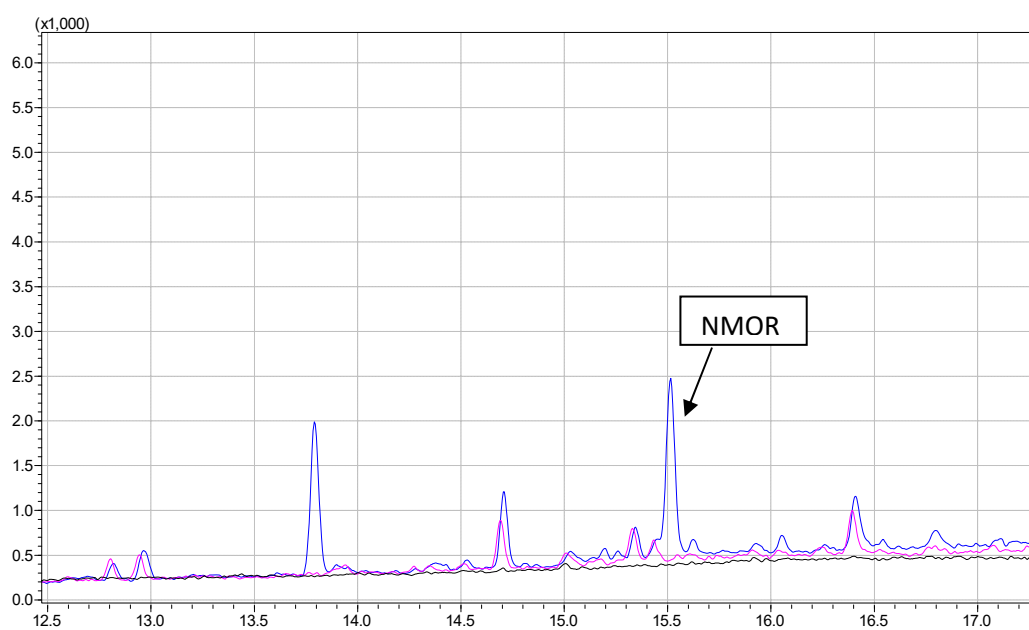

**Figure S14. Comparison of chromatograms for NMOR m/z 116 a) blank (black line) b) sample solution of cilostazol (pink line) c) reference sample solution cilostazol spiked with the standard solution of nitrosamines at concentration level of 18.0 ng/mL (blue line) (CAL 100%).**

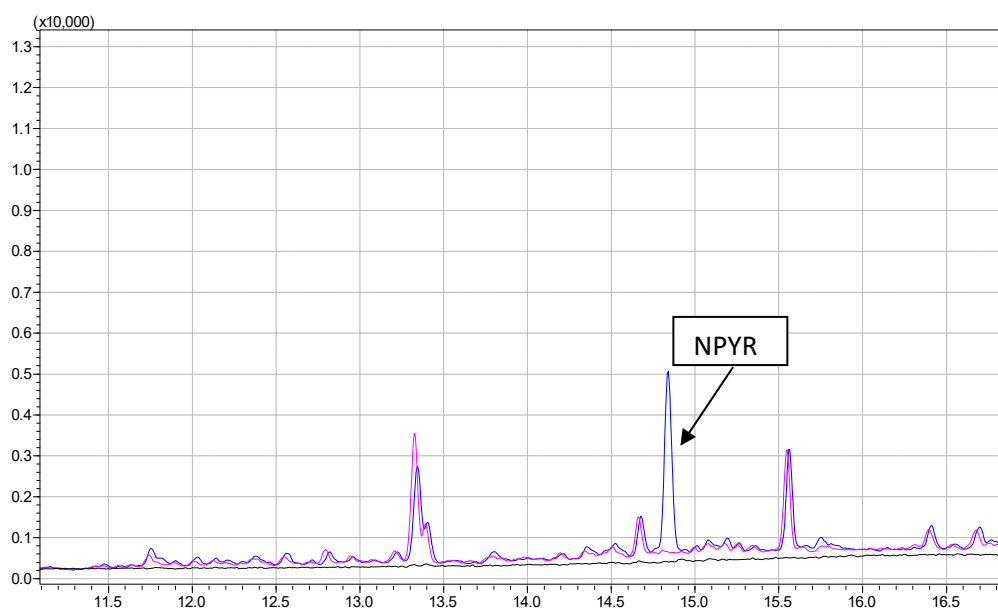

**Figure S15. Comparison of chromatograms for NPYR m/z 100 a) blank (black line) b) sample solution of cilostazol (pink line) c) reference sample solution cilostazol spiked with the standard solution of nitrosamines at concentration level of 18.0 ng/mL (blue line) (CAL 100%).**

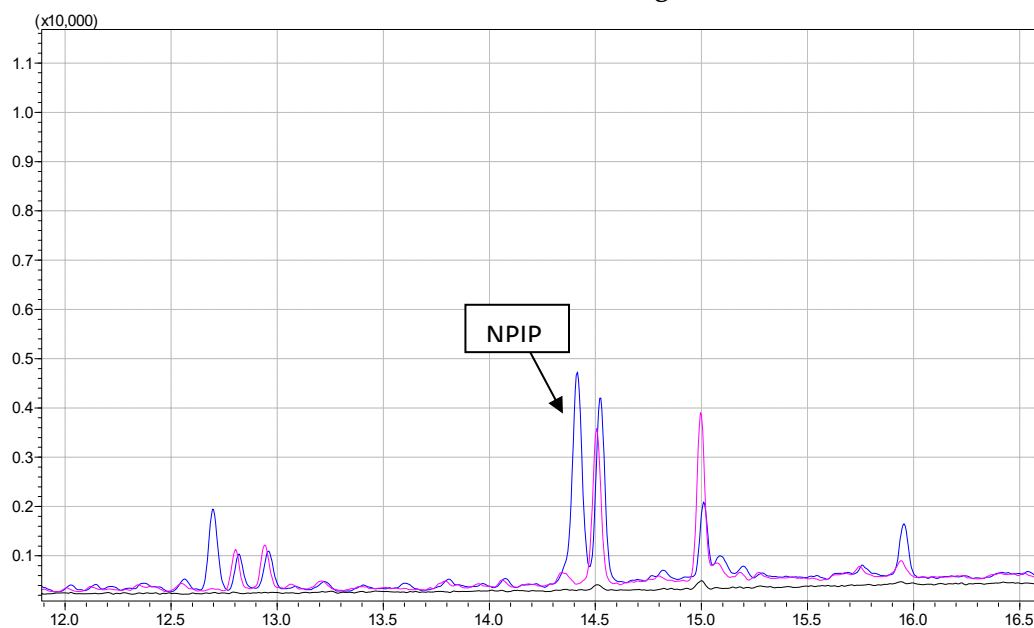

**Figure S16. Comparison of chromatograms for NPIP m/z 114 a) blank (black line) b) sample solution of cilostazol (pink line) c) reference sample solution cilostazol spiked with the standard solution of nitrosamines at concentration level of 18.0 ng/mL (blue line) (CAL 100%).**

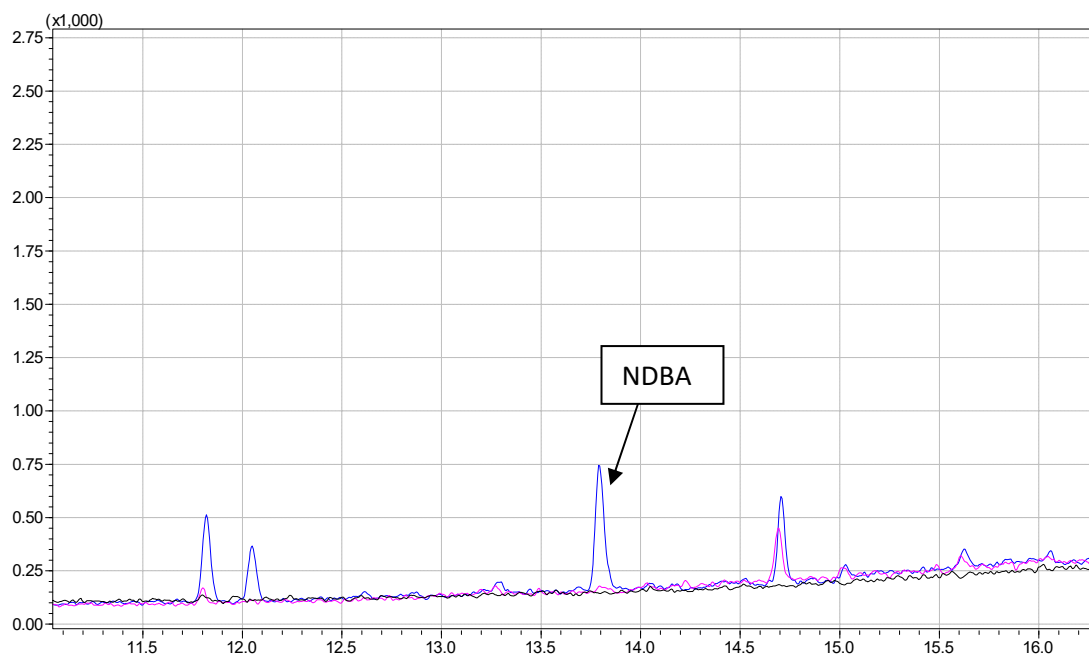

**Figure S17. Comparison of chromatograms for NDBA m/z 158 a) blank (black line) b) sample solution of cilostazol (pink line) c) reference sample solution cilostazol spiked with the standard solution of nitrosamines at concentration level of 18.0 ng/mL (blue line) (CAL 100%).**

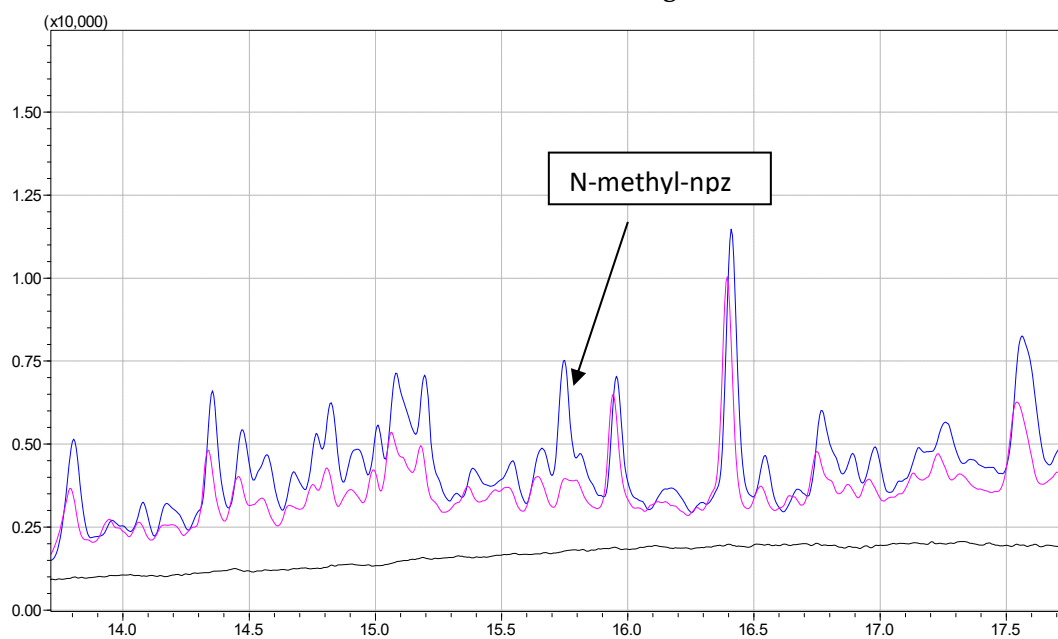

**Figure S18. Comparison of chromatograms for N-methyl-npz m/z 99 a) blank (black line) b) sample solution of cilostazol (pink line) c) reference sample solution cilostazol spiked with the standard solution of nitrosamines at concentration level of 18.0 ng/mL (blue line) (CAL 100%).**

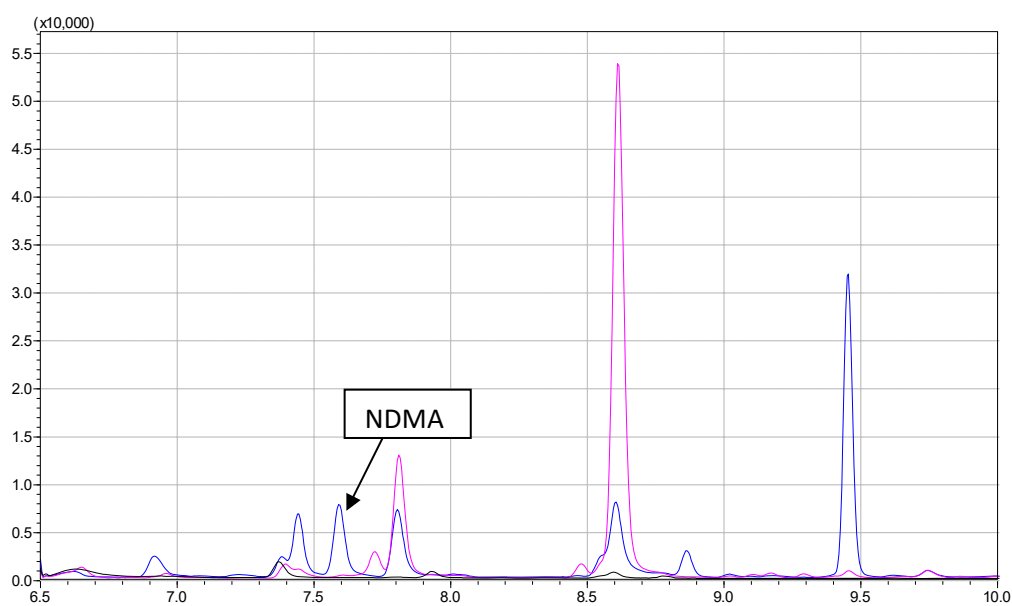

**Figure S19. Comparison of chromatograms for NDMA m/z 74 a) blank (black line) b) sample solution of Olmesartan medoxomil (pink line) c) reference sample solution Olmesartan medoxomil spiked with the standard solution of nitrosamines at concentration level of 18.0 ng/mL (blue line) (CAL 100%).**

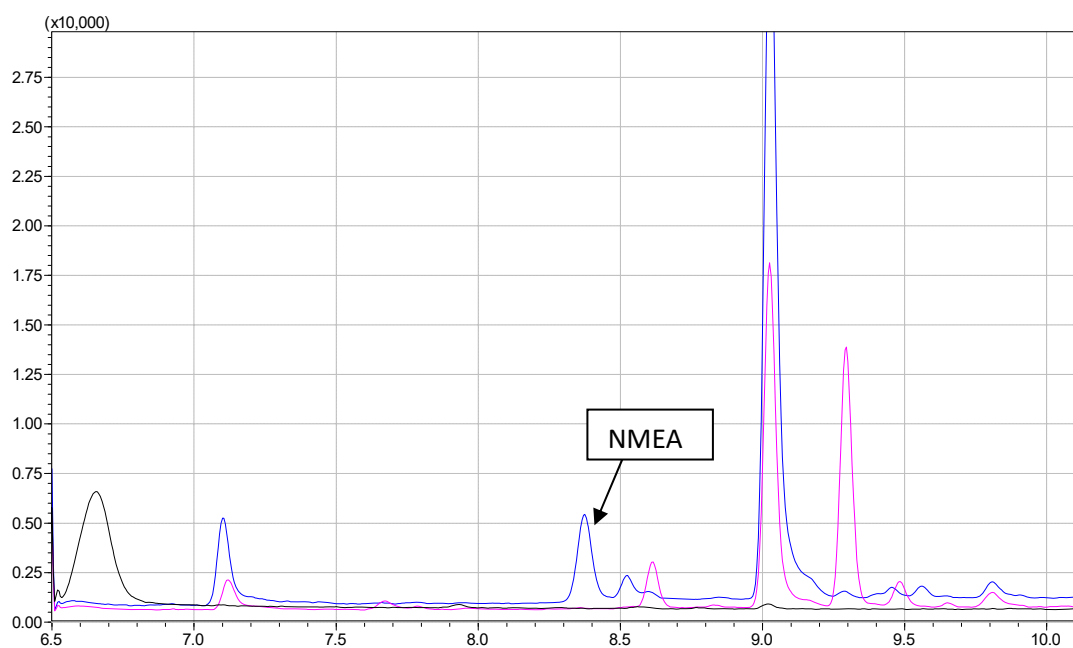

**Figure S20. Comparison of chromatograms for NMEA m/z 88 a) blank (black line) b) sample solution of Olmesartan medoxomil (pink line) c) reference sample solution Olmesartan medoxomil spiked with the standard solution of nitrosamines at concentration level of 18.0 ng/mL (blue line) (CAL 100%).**

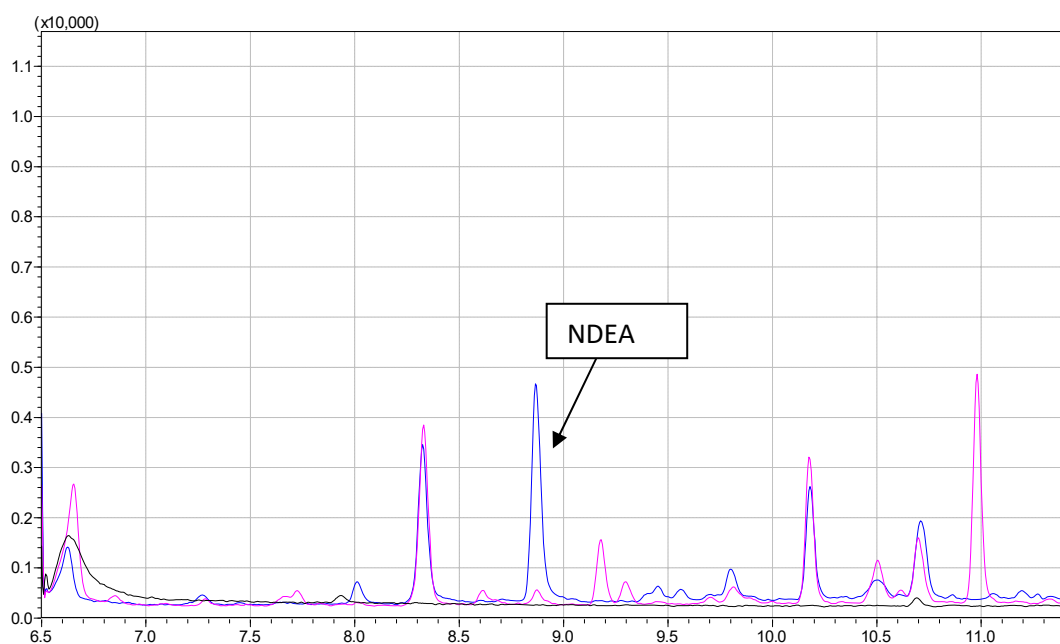

**Figure S21. Comparison of chromatograms for NDEA m/z 102 a) blank (black line) b) sample solution of Olmesartan medoxomil (pink line) c) reference sample solution Olmesartan medoxomil spiked with the standard solution of nitrosamines at concentration level of 18.0 ng/mL (blue line) (CAL 100%).**

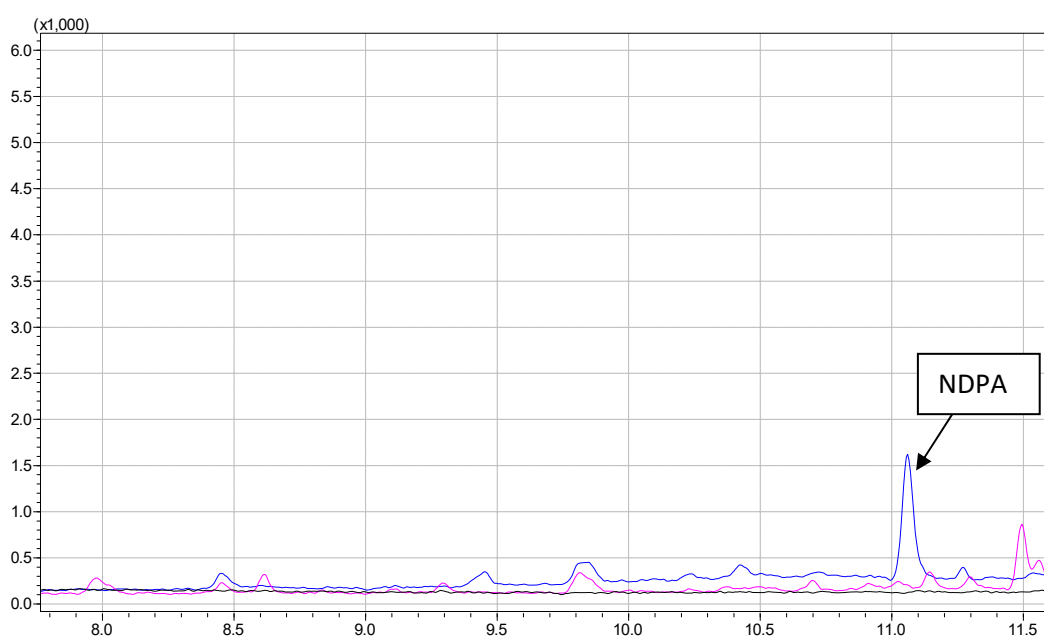

**Figure S22. Comparison of chromatograms for NDPA m/z 130 a) blank (black line) b) sample solution of Olmesartan medoxomil (pink line) c) reference sample solution Olmesartan medoxomil spiked with the standard solution of nitrosamines at concentration level of 18.0 ng/mL (blue line) (CAL 100%).**

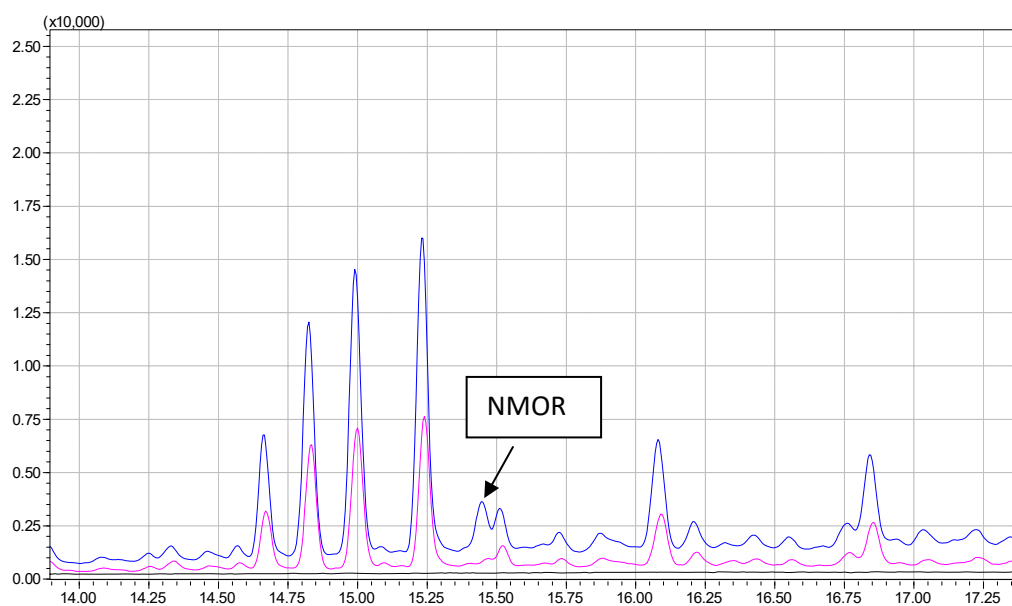

**Figure S23. Comparison of chromatograms for NMOR m/z 116 a) blank (black line) b) sample solution of Olmesartan medoxomil (pink line) c) reference sample solution Olmesartan medoxomil spiked with the standard solution of nitrosamines at concentration level of 18.0 ng/mL (blue line) (CAL 100%).**

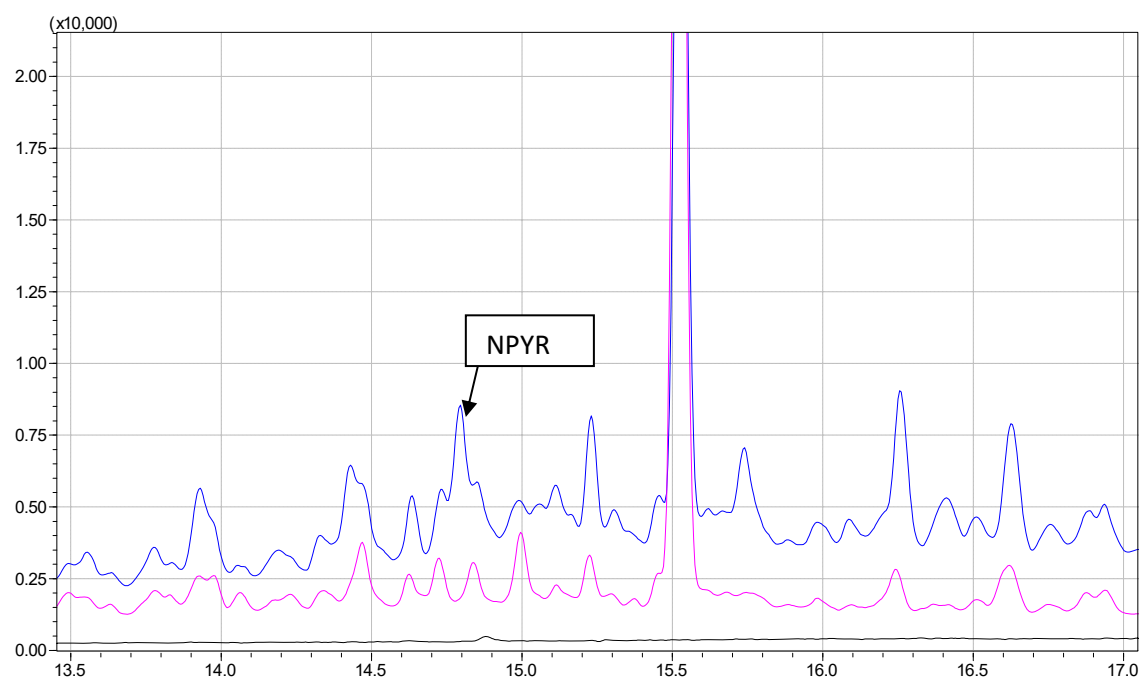

**Figure S24. Comparison of chromatograms for NPYR m/z 100 a) blank (black line) b) sample solution of Olmesartan medoxomil (pink line) c) reference sample solution Olmesartan medoxomil spiked with the standard solution of nitrosamines at concentration level of 18.0 ng/mL (blue line) (CAL 100%).**

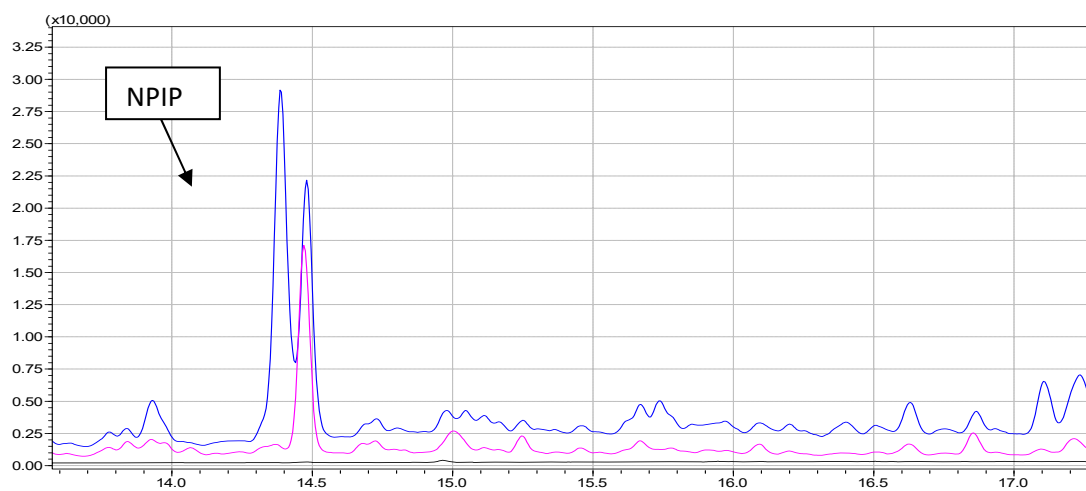

Figure S25. Comparison of chromatograms for NPIP m/z 114 a) blank (black line) b) sample solution of Olmesartan medoxomil (pink line) c) reference sample solution Olmesartan medoxomil spiked with the standard solution of nitrosamines at concentration level of 18.0 ng/mL (blue line) (CAL 100%).

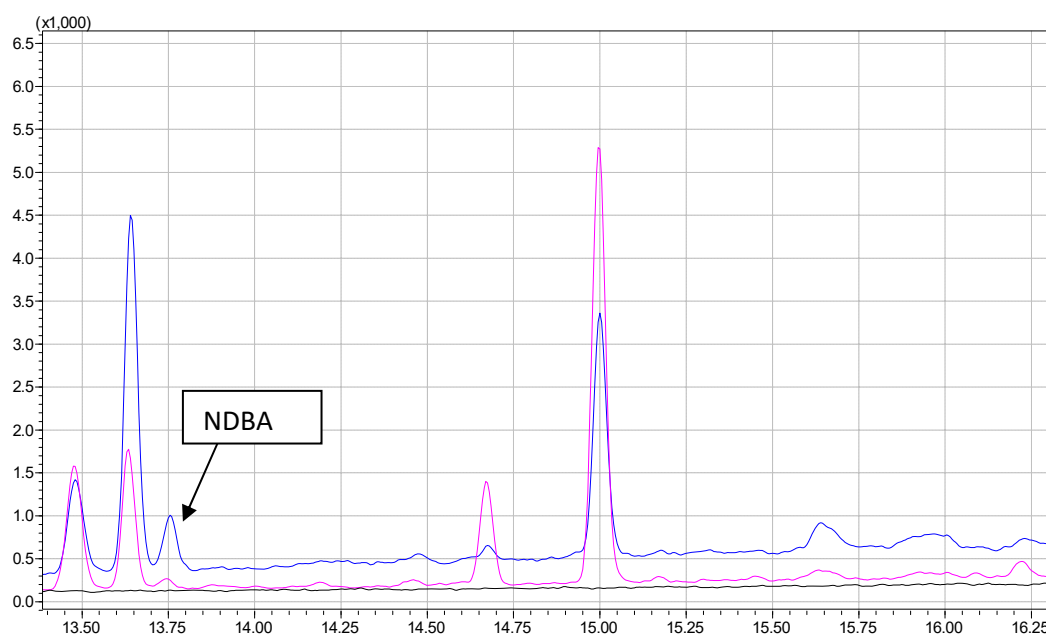

Figure S26. Comparison of chromatograms for NDBA m/z 158 a) blank (black line) b) sample solution of Olmesartan medoxomil (pink line) c) reference sample solution Olmesartan medoxomil spiked with the standard solution of nitrosamines at concentration level of 18.0 ng/mL (blue line) (CAL 100%).



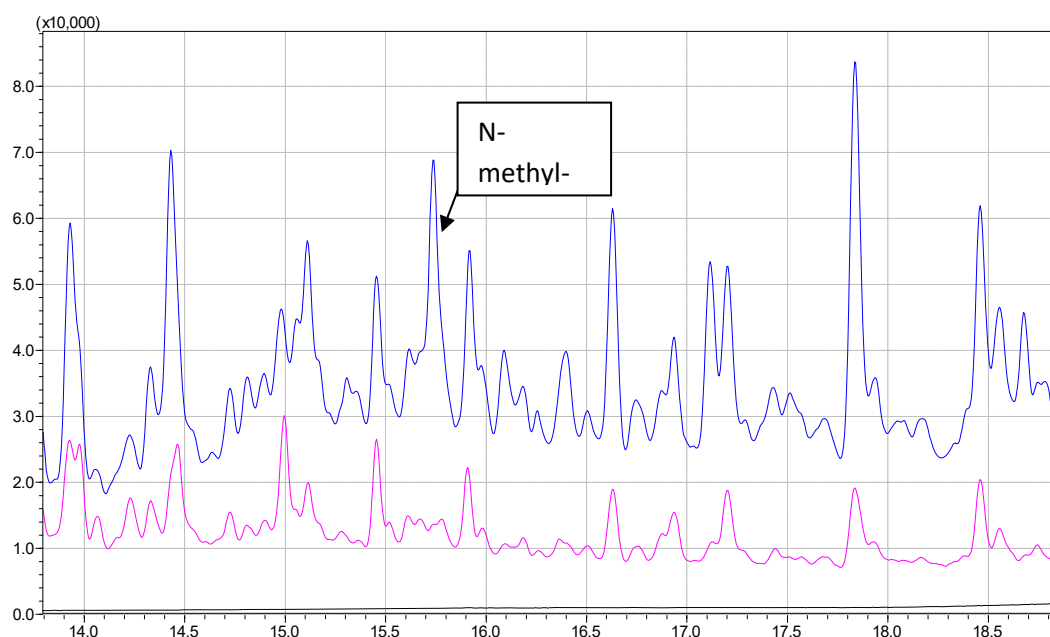

**Figure S27. Comparison of chromatograms for N-methyl-npz m/z99 a) blank (black line) b) sample solution of Olmesartan medoxomil (pink line) c) reference sample solution Olmesartan medoxomil spiked with the standard solution of nitrosamines at concentration level of 18.0 ng/mL (blue line) (CAL 100%).**

### Supplementary Note S1 –Calculations 1

The recovery (R) in percent is calculated from the following formula:

$$\text{Recovery} = \frac{C_{\text{cal}}}{C} \cdot 100\%$$

where:

C - real concentration of solution, %

C<sub>cal</sub> - calculated concentration of solution, %

Confidence interval (CI) was calculated using the following formula:

$$CI = t_{(\alpha, 0.05, n-1)} \cdot SD / \sqrt{n}$$

where:

SD – standard deviation.

n – number of data.

t – Student's t-test at the 0.05 percent confidence level with n-1 degrees of freedom

Concentration of solution was calculated using a linear regression from LOQ to 120% of specification limit ( $y=ax+b$ ).

Standard deviation and relative standard deviation were calculated using the following formulas:

$$SD = \sqrt{\frac{\sum_{i=1}^n (y_i - y_{mean})^2}{n - 1}}$$

$$RSD = \frac{SD}{y_{mean}} \cdot 100\%$$

where:

y – individual result

$y_{mean}$  – mean of results

n – population of the sample

Confidence interval (CI) was calculated using the following formula:

$$CI = t_{(\alpha, 0.05, n-1)} \cdot SD / \sqrt{n}$$

where:

SD – standard deviation.

n – number of data.

t – Student's t-test at the 0.05 percent confidence level with n-1 degrees of freedom

Horwitz's test was calculated using the following formulas:

$$HORRAT(r) = RSD_{Ccal} / PRSD(R)$$

$$PRSD(R) = 2 \cdot C^{-0.15}$$

where:

HORRAT – the ratio of reproducibility relative standard deviation

$RSD_{Ccal}$  – relative standard deviation of the concentration calculated results. %

PRSD(R) – predicted relative standard deviation. %

C –concentration, expressed as a decimal fraction

#### References:

1. Alshehri, Y.M.; Alghamdi, T.S.; Aldawsari, F.S. HS-SPME-GC-MS as an Alternative Method for NDMA Analysis in Ranitidine Products. *J. Pharm. Biomed. Anal.* **2020**, *191*, 113582, doi:10.1016/j.jpba.2020.113582.
2. Giménez-Campillo, C.; Pastor-Belda, M.; Campillo, N.; Hernández-Córdoba, M.; Viñas, P. Development of a New Methodology for the Determination of N-Nitrosamines Impurities in Ranitidine Pharmaceuticals Using Microextraction and Gas Chromatography-Mass Spectrometry. *Talanta* **2021**, *223*, doi:10.1016/j.talanta.2020.121659.
3. Liu, J.; Xie, B.; Mai, B.; Cai, Q.; He, R.; Guo, D.; Zhang, Z.; Fan, J.; Zhang, W. Development of a Sensitive and Stable GC-MS/MS Method for Simultaneous Determination of Four N-Nitrosamine Genotoxic Impurities in Sartan Substances. *J. Anal. Sci. Technol.* **2021**, *12*, doi:10.1186/s40543-020-00254-2.
4. Lim, H.H.; Oh, Y.S.; Shin, H.S. Determination of N-Nitrosodimethylamine and N-Nitrosomethylethylamine in Drug Substances and Products of Sartans, Metformin and Ranitidine by Precipitation and Solid Phase Extraction and Gas Chromatography–Tandem Mass Spectrometry. *J. Pharm. Biomed. Anal.* **2020**, *189*, 113460, doi:10.1016/j.jpba.2020.113460.
5. Tsutsumi, T.; Akiyama, H.; Demizu, Y.; Uchiyama, N.; Masada, S.; Tsuji, G.; Arai, R.; Abe, Y.; Hakamatsuka, T.; Izutsu, K.; et al. Analysis of an Impurity, N-Nitrosodimethylamine, in Valsartan Drug Substances and Associated Products Using GC-MS. *Biol. Pharm. Bull.* **2019**, *42*, 547–551, doi:10.1248/bpb.b19-00006.
6. FDA Combined Headspace N-Nitrosodimethylamine (NDMA), N-Nitrosodiethylamine (NDEA), N-Nitrosoethylisopropylamine (NEIPA), and N-Nitrosodiisopropylamine (NDIPA) Impurity Assay by GC-MS/MS. **2019**, 1–7.
7. New OMCL Method for Simultaneous Determination of NDMA and NDEA in Sartan. Available online: <https://www.edqm.eu/documents/52006/71923/Ad-hoc-projects-OMCL-Network-ranitidine.pdf/f775fbf3-705e-ce82-d1e1-8eb3c06002d4?t=1628667875462>.
8. Wichitnithad, W.; Sudtanon, O.; Srisunak, P.; Cheewatanakornkool, K.; Nantaphol, S.; Rojsitthisak, P. Development of a Sensitive Headspace Gas Chromatography–Mass

Spectrometry Method for the Simultaneous Determination of Nitrosamines in Losartan Active Pharmaceutical Ingredients. *ACS Omega* **2021**, *6*, 11048–11058, doi:10.1021/acsomega.1c00982.

9. Lee, D.H.; Hwang, S.H.; Park, S.; Lee, J.; Oh, H. Bin; Han, S.B.; Liu, K.-H.; Lee, Y.-M.; Pyo, H.S.; Hong, J. A Solvent-Free Headspace GC/MS Method for Sensitive Screening of N-Nitrosodimethylamine in Drug Products. *Anal. Methods* **2021**, *13*, 3402–3409, doi:10.1039/D1AY01036K.
